# Supplementary material for: Benchmarking Farm Animal Welfare—A Novel Tool for Cross-Country Comparison Applied to Pig Production and Pork Consumption
Source: MDPI journal article supplement (doi:10.3390/ani10060955), 2020-05-31
Supplement: s1 [file s1]

## S1: Key figures for the pig industries

The pig industries are significantly different in the countries included in this study, and this can be factors explaining a part of the benchmark values. The size of the industry, the international trade and the farm structure for all five countries are shown below. When benchmark value for domestic consumption is calculated, domestic consumption is estimated as production + import – export +/- stock changes. “Domestic supply” as shown in the table is used as an approximation of consumption.

*Table: Key figures for the pig industry in the countries included in this study*

|           | 1)      | 1)           | 1)         | 1)         | 1)         | 1)          | 2)          |
|-----------|---------|--------------|------------|------------|------------|-------------|-------------|
|           |         |              |            |            | Pig meat   | Self        |             |
|           | Pigs    | Pig meat     | Pig meat   | Pig meat   | Domestic   | sufficiency | Pigs per    |
|           | stock   | Production   | Export     | Import     | supply     | rate        | pig holding |
|           | Million | Million tons | 1.000 tons | 1.000 tons | 1.000 tons | Percent     | Pigs        |
| Year      | 2018    | 2018         | 2017       | 2017       | 2017       | 2017        | 2013        |
| <b>DK</b> | 13      | 2            | 1.306      | 126        | 240        | 660         | 3.128       |
| <b>D</b>  | 26      | 5            | 2.355      | 1.121      | 4.170      | 129         | 584         |
| <b>NL</b> | 12      | 1            | 1.164      | 371        | 636        | 230         | 2.208       |
| <b>ES</b> | 31      | 5            | 1.827      | 185        | 2.501      | 181         | 467         |
| <b>S</b>  | 1       | 0            | 30         | 120        | 330        | 75          | 1.093       |
| <b>UK</b> | 5       | 1            | 262        | 1.007      | 1.649      | 56          | 473         |
| <b>EU</b> | 150     | 24           | 10.273     | 7.641      | 21.068     | 114         | 66          |

1) Source: FAOSTAT (2020)

2) Source: Eurostat (2020)
