# Supplementary material for: Benchmarking Farm Animal Welfare—A Novel Tool for Cross-Country Comparison Applied to Pig Production and Pork Consumption
Source: MDPI journal article supplement (doi:10.3390/ani10060955), 2020-05-31
Supplement: s1 [file s1]

**Table S3: Overview of animal welfare labels, market shares and import export for The Netherlands, Sweden, Germany, United Kingdom and Denmark**

**The Netherlands**

A few introductory comments. The market shares of some of the labels are not represented individually in the calculation of market shares of welfare labels.

**Dutch law** (IKB Varken and Heyde Hoeve are categorized here as having the same animal welfare as Dutch law). IKB Varken covers almost all production (95%). Mainly food safety and biosecurity.

**BL1** (Keten Duurzam Varkenvlees KDV (Sustainable Pork Value Chain), Good farming star, Good farming welfare, Friear-Friberne, Scharrelvarken, Livar, Wroetvarken are categorized here as having the same animal welfare as BL1). Note KDV has 2 levels, KDV1 does not qualify for BL1 – only KDV2 does but they are both categorized here as BL1, but the volume is small.

**BL2** (Hamletz is categorized here as having the same animal welfare as BL2)

**BL3** (Livar and De groene Weg are categorized here as having the same animal welfare as BL3)

**Organic** (is perceived here to provide the same animal welfare as BL3 but is represented separately)

**Table S3.1 Overview of market shares for animal welfare labelled pork in the Netherlands**

|                                                                                 | Introduced  | Market shares of consumption (volume)                                                      | Share of production (volume)                                                               | Institution                              |
|---------------------------------------------------------------------------------|-------------|--------------------------------------------------------------------------------------------|--------------------------------------------------------------------------------------------|------------------------------------------|
| <b>Dutch law</b>                                                                |             | 0%                                                                                         | 5%                                                                                         |                                          |
| <b>IKB Varken</b>                                                               | 1995        | 22% of consumption (=100-75-3)                                                             | 73% of production (=95-20-2)                                                               |                                          |
| <b>Beter Leven (Better Life)</b><br>BL1 indoor<br>BL2 Free range<br>BL3 Organic | 2008 (pigs) | 75% of pork consumption in 2019 hereof<br>BL1– 97% of BL<br>BL2 0,1% of BL<br>BL3 3% of BL | 20% of production (3.6 mio. Pigs) in 2019<br>BL1 99% of BL<br>BL2 0% of BL<br>BL3 1% of BL | Dutch Society for protection of animals  |
| <b>Keten duurzaam Varkenvlees KDV</b><br>KDV1 below BL1<br>KDV2 as BL1          | 1997        | Share of consumption – reported under BL1                                                  | (2.7% of production)<br>Reported under BL1                                                 | KDV                                      |
| <b>Good farming star</b><br>as BL1                                              | 2010        | Share of consumption – reported under BL1                                                  | (5.3% of production)<br>Reported under BL1                                                 | VION                                     |
| <b>Good farming welfare</b><br>as BL1                                           | Ca. 2010    | 0%                                                                                         | 1 million finishers in 2014<br>Reported under BL1                                          | VION (only export to the British market) |
| <b>Wroetvarken</b><br>as BL1                                                    | 2019        | Share of consumption – reported under BL1                                                  | 40.000 pigs<br>Reported under BL1                                                          |                                          |
| <b>Hamletz</b><br>as BL2                                                        |             | Share of consumption – reported under BL2                                                  | 5000 pigs<br>Reported under BL2                                                            |                                          |
| <b>Friear-Friberne</b>                                                          | 2002        | Not included                                                                               | 50.000 pigs<br>Not included                                                                | WelfareQuality assessment                |
| <b>Livar</b><br>As BL3                                                          | 1999        | Share of consumption reported under BL3                                                    | 7.000 pigs<br>Reported under BL3                                                           | Livar                                    |
| <b>Heide Hoeve</b><br>Below BL1                                                 |             | Reported under IKB Varken                                                                  | 30.000 pigs<br>Reported under IKB                                                          |                                          |
| <b>Organic (EKO)</b><br>as BL 3                                                 |             | 3% of consumption                                                                          | 2%                                                                                         | SKAL (De Groene weg)                     |
| <b>Import and export</b>                                                        |             | 22% of consumption                                                                         | 45% of production                                                                          |                                          |

Note:

The Netherlands import of pork amounts to approx. 50 per cent. of consumption. As the case with Denmark, a significant part is probably re-exported. We have assumed that 22 per cent of consumption is the import of foreign-produced pork for human consumption in the Netherlands. Thereby, IKB Varken market shares can be calculated as the residual ( $22=100-75-3$ ).

## Sweden

**Table S3.2 Overview of market shares for animal welfare labelled pork in Sweden**

|                          | Introduced | Market shares of consumption (volume)             | Share of production (volume)      | Institution                 |
|--------------------------|------------|---------------------------------------------------|-----------------------------------|-----------------------------|
| <b>Swedish law</b>       |            | 62% of consumption<br>(= $100-35-1,5-0,75-0,75$ ) | 97% of production<br>(= $100-3$ ) | Public authorities          |
| <b>IP Sigill</b>         | 1992       | 0,75% of consumption                              | 1% of production                  | Private                     |
| <b>John's Selection</b>  | 2017       | 0,75% of consumption                              | 0% of production                  | Sold in COOP (Dutch origin) |
| <b>Organic</b>           | 1988       | 1,5 % of consumption                              | 2% of production                  | KRAV (private)              |
| <b>Import and export</b> |            | 35% of consumption                                | 12% of production                 |                             |

## Germany

A few introductory comments

**QS** is not included as the welfare criteria are almost identical to German national law. 95% of the German pig production is QS certified

**Initiative Tierwohl** is included as follows. There are two levels of IT. We assume that 50% comply with the voluntary criteria IT2 and 50% comply with base level IT1.

**Organic** There are a number of different organic labels in Germany that all guarantee at least that the EU minimum requirements are satisfied (Naturland, Demeter, Bioland and maybe more). All are gathered in "EU organic".

**Tierschutz Kontrolliert** from the Vier Pfoten organization is not yet marketed for pigs and is therefore not included.

**Tierwohl kennzeichen** The coming state label is not included as it is not yet marketed.

**Haltungsform** serves to classify existing labels into four categories: H1 equivalent to QS, H2 as IT1, H3 as T1, H4 as T2.

Haltungsform is not registered as a separate label.

**Table S3.3 Overview of market shares for animal welfare labelled pork in Germany**

|                                                                      | Introduced                                                                                   | Market shares of consumption                                                                                 | Market share of production                                                                             | Institution                             |
|----------------------------------------------------------------------|----------------------------------------------------------------------------------------------|--------------------------------------------------------------------------------------------------------------|--------------------------------------------------------------------------------------------------------|-----------------------------------------|
| <b>German law</b>                                                    |                                                                                              | <b>0%</b>                                                                                                    | <b>5% of production</b>                                                                                |                                         |
| <b>QS</b>                                                            |                                                                                              | <b>46% of consumption</b><br>(=100-27-0.2-0.1-1-25)                                                          | <b>74% of production</b><br>(=95-20-0.1-0.05-0.6)                                                      |                                         |
| <b>Initiative Tierwohl</b><br>IT1 base<br>IT2 voluntary              | 2017                                                                                         | IT1 12.5 %<br>IT2 12.5 %                                                                                     | IT1 10 %<br>IT2 10 %                                                                                   | Private initiative                      |
| <b>Für mehr Tierschutz</b><br>T1 indoor<br>T2 outdoor                | 2013<br>Only for finishers                                                                   | T1 0.1 %<br>T2 0.1 %                                                                                         | T1 0.05 %<br>T2 0.05 %                                                                                 | Deutsches Tierschutzbund                |
| <b>Haltungsform</b><br>H1 as QS<br>H2 as IT1<br>H3 as T1<br>H4 as T2 | April 2018: Lidl<br>Haltungskompass.<br>April 2019:<br>Haltungsform<br>more super<br>markets | <b>In total 25% but registered under the respective labels</b><br>H1 11 %<br>H2 11 %<br>H3 1.5 %<br>H4 1.5 % | <b>In total 20% but registered under the respective labels</b><br>H1 9 %<br>H2 9 %<br>H3 1 %<br>H4 1 % | Retail                                  |
| <b>Neuland</b><br>Outdoor                                            | 1989                                                                                         | <b>0.1%</b>                                                                                                  | <b>0.05%</b>                                                                                           | Private,<br>Deutsches<br>Tierschutzbund |
| <b>Organic</b>                                                       |                                                                                              | <b>1%</b>                                                                                                    | <b>0.6%</b>                                                                                            | Various private labels                  |
| <b>Import and export</b>                                             |                                                                                              | 27% of consumption imported                                                                                  | 44% of production exported                                                                             |                                         |

**Table S3.4 Overview of market shares for animal welfare labelled pork in the UK**

|                                                                                              | Introduced                                               | Market shares of consumption                                                                                                                      | Share of production                                                                                                                                | Institution                                   |
|----------------------------------------------------------------------------------------------|----------------------------------------------------------|---------------------------------------------------------------------------------------------------------------------------------------------------|----------------------------------------------------------------------------------------------------------------------------------------------------|-----------------------------------------------|
| UK common law                                                                                |                                                          | 0%                                                                                                                                                | 5%                                                                                                                                                 |                                               |
| Red tractor                                                                                  |                                                          | 12%=100-62-20-5-1                                                                                                                                 | 44% (=95-40-10-1)                                                                                                                                  | Private                                       |
| RSPCA assured<br>R1 indoor<br>R2 outdoor bred<br>R3 outdoor reared<br>R4 free-range finished | 1994 Freedom Food (name change to RSPCA assured in 2016) | <b>R1 5%</b><br><b>R2-R4 20% of consumption outdoors divided into</b><br>R2 14% outdoor bred<br>R3 5% outdoor reared<br>R4 1% free-range finished | <b>R1 10%</b><br><b>R2-R4 40% of production outdoors divided into</b><br>R2 27% outdoor bred<br>R3 10% outdoor reared<br>R4 3% free-range finished | Private                                       |
| Organic                                                                                      | 1946                                                     | 1%                                                                                                                                                | 1%                                                                                                                                                 | Soil association, Organic farmers and Growers |
| Import and export (2018 figures)                                                             |                                                          | 62% of consumption is imported                                                                                                                    | 29% of production is exported                                                                                                                      |                                               |

Note: The countries that the UK import from and import volumes are shown in supplementary material S2.

**Table S3.5 Overview of market shares for animal welfare labelled pork in Denmark**

|                                                                                              | Introduced | Market shares of consumption                                | Share of production                                    | Institution                                                            |
|----------------------------------------------------------------------------------------------|------------|-------------------------------------------------------------|--------------------------------------------------------|------------------------------------------------------------------------|
| <b>Danish law</b>                                                                            |            | 0%                                                          | 5%                                                     |                                                                        |
| <b>Danish brand</b>                                                                          |            | 70% of consumption (=100-10-20)                             | 88% of production (=100-6-0,01-0,3-0,7)                |                                                                        |
| <b>Better Animal welfare</b><br>F1 indoor<br>F2 indoor<br>F3 outdoor                         | 2017       | 7% of consumption<br>F1 0%<br>F2 5%<br>F3 2%                | 0,7% of production<br>F1 0%<br>F2 0,5%<br>F3 0,2%      | Public authorities<br>Danish Veterinary and Food Administration (DVFA) |
| <b>Welfare heart</b><br>C1 indoor<br>C2 outdoor<br>C3 outdoor as organic<br>C4 outdoor extra | 2016       | 3% of consumption<br>C1 0,9%<br>C2 0,9%<br>C3 2%<br>C4 0,2% | 0,3% of production<br>C1 0,1%<br>C2 0,1%<br>C3-C4 0,1% | Private (COOP)                                                         |
| <b>Danish organic</b>                                                                        |            | 0,1%                                                        | 0,01%                                                  | Public authorities                                                     |
| <b>UK pigs</b>                                                                               |            | 0%                                                          | 6% of production                                       | Private                                                                |
| <b>Import and export</b>                                                                     |            | 20% of consumption is imported                              | 90% of production is exported                          |                                                                        |

Notes: Altogether approx. 10% of consumption is welfare pork hereof 6% indoor welfare and 4% outdoor welfare. Denmark's import of pork amounts to approx. 50 per cent. of consumption. However, a significant part is re-import of pork processing abroad or it is re-exported. It is therefore assumed that 20 per cent of consumption is the import of foreign-produced pork for human consumption in Denmark

**Table S3.6 Import share of consumption and export share of production in each country**

|    | <b>Import share of consumption</b> | <b>Export share of production</b> |
|----|------------------------------------|-----------------------------------|
| DK | 53%                                | 83%                               |
| D  | 27%                                | 44%                               |
| NL | 58%                                | 80%                               |
| ES | 7%                                 | 40%                               |
| S  | 36%                                | 12%                               |
| UK | 61%                                | 28%                               |
| EU | 36%                                | 43%                               |

Note: Estimated based on key figures for pig production from FAOSTAT (2020) – the data are from 2017 or 2018
