# Supplementary material for: Benchmarking Farm Animal Welfare—A Novel Tool for Cross-Country Comparison Applied to Pig Production and Pork Consumption
Source: MDPI journal article supplement (doi:10.3390/ani10060955), 2020-05-31
Supplement: s1 [file s1]

## **Table S4: Expert questionnaire on animal welfare in pig production**

Thank you for agreeing to participate in our survey.

We would like you to evaluate the animal welfare effects of various initiatives for pig production in comparison to the EU regulations. The questionnaire is divided into four themes:

Welfare for the sow

Welfare for the piglet

Welfare for weaners and finishers

Welfare issues that span different categories

For each question below, we ask you to assign a number between 0 and 10, where:

0 represents minimal welfare for the pigs

10 represents the best possible welfare for the pigs

The assumption in every question is that all other aspects are equal, so that you only evaluate one aspect of the production systems in each question.

In the last part of the questionnaire, we ask you to evaluate how important the individual aspects of the production systems are for pig welfare as a whole.

### **Informed consent**

**By taking part in this survey you consent that the data from this survey will be used in our studies, and you understand that all analysis and presentation of data from this survey will be anonymous and in no way tracked back to you personally. Do you consent with these conditions?**

(1) ☐ I consent

(2) ☐ I do not consent

## SOWS

What score would you give for sow welfare in a production system where the sow is confined for certain periods? The scale is from 0 to 10 where 0 represents minimal welfare for the sow and 10 represents the best possible welfare for the sow regarding this feature.

**Note:** The welfare of the piglets in this production system is addressed in another question.

|                                                                                                                                            | 0                            | 1                            | 2                            | 3                             | 4                             | 5                             | 6                             | 7                             | 8                             | 9                             | 10                            | Do not know                   |
|--------------------------------------------------------------------------------------------------------------------------------------------|------------------------------|------------------------------|------------------------------|-------------------------------|-------------------------------|-------------------------------|-------------------------------|-------------------------------|-------------------------------|-------------------------------|-------------------------------|-------------------------------|
| The sow is confined at all times (does not meet EU requirements)                                                                           | (2) <input type="checkbox"/> | (3) <input type="checkbox"/> | (4) <input type="checkbox"/> | (12) <input type="checkbox"/> | (13) <input type="checkbox"/> | (14) <input type="checkbox"/> | (15) <input type="checkbox"/> | (16) <input type="checkbox"/> | (17) <input type="checkbox"/> | (18) <input type="checkbox"/> | (19) <input type="checkbox"/> | (20) <input type="checkbox"/> |
| The sow is loose in the gestation unit (i.e. loose 60% of the time) but confined in the mating and farrowing units (meets EU requirements) | (2) <input type="checkbox"/> | (3) <input type="checkbox"/> | (4) <input type="checkbox"/> | (12) <input type="checkbox"/> | (13) <input type="checkbox"/> | (14) <input type="checkbox"/> | (15) <input type="checkbox"/> | (16) <input type="checkbox"/> | (17) <input type="checkbox"/> | (18) <input type="checkbox"/> | (19) <input type="checkbox"/> | (20) <input type="checkbox"/> |
| The sow is loose in the mating and gestation units (i.e. loose 80% of the time) but confined in the farrowing unit                         | (2) <input type="checkbox"/> | (3) <input type="checkbox"/> | (4) <input type="checkbox"/> | (12) <input type="checkbox"/> | (13) <input type="checkbox"/> | (14) <input type="checkbox"/> | (15) <input type="checkbox"/> | (16) <input type="checkbox"/> | (17) <input type="checkbox"/> | (18) <input type="checkbox"/> | (19) <input type="checkbox"/> | (20) <input type="checkbox"/> |
| The sow is loose at all times except 4-5 days around farrowing                                                                             | (2) <input type="checkbox"/> | (3) <input type="checkbox"/> | (4) <input type="checkbox"/> | (12) <input type="checkbox"/> | (13) <input type="checkbox"/> | (14) <input type="checkbox"/> | (15) <input type="checkbox"/> | (16) <input type="checkbox"/> | (17) <input type="checkbox"/> | (18) <input type="checkbox"/> | (19) <input type="checkbox"/> | (20) <input type="checkbox"/> |
| The sow is loose at all times except 2-3 day around farrowing                                                                              | (2) <input type="checkbox"/> | (3) <input type="checkbox"/> | (4) <input type="checkbox"/> | (12) <input type="checkbox"/> | (13) <input type="checkbox"/> | (14) <input type="checkbox"/> | (15) <input type="checkbox"/> | (16) <input type="checkbox"/> | (17) <input type="checkbox"/> | (18) <input type="checkbox"/> | (19) <input type="checkbox"/> | (20) <input type="checkbox"/> |
| The sow is loose at all times                                                                                                              | (2) <input type="checkbox"/> | (3) <input type="checkbox"/> | (4) <input type="checkbox"/> | (12) <input type="checkbox"/> | (13) <input type="checkbox"/> | (14) <input type="checkbox"/> | (15) <input type="checkbox"/> | (16) <input type="checkbox"/> | (17) <input type="checkbox"/> | (18) <input type="checkbox"/> | (19) <input type="checkbox"/> | (20) <input type="checkbox"/> |
| The sow is loose at all times and she farrows in huts with outdoor access                                                                  | (2) <input type="checkbox"/> | (3) <input type="checkbox"/> | (4) <input type="checkbox"/> | (12) <input type="checkbox"/> | (13) <input type="checkbox"/> | (14) <input type="checkbox"/> | (15) <input type="checkbox"/> | (16) <input type="checkbox"/> | (17) <input type="checkbox"/> | (18) <input type="checkbox"/> | (19) <input type="checkbox"/> | (20) <input type="checkbox"/> |

What score would you give for sow welfare in a production system with the following space requirements for sows with piglets? The scale is from 0 to 10 where 0 represents minimal welfare for the sow and 10 represents the best possible welfare for the sow.

**Note:** The welfare of the piglets in this production system is addressed in another question.

|                                    | 0                            | 1                            | 2                            | 3                             | 4                             | 5                             | 6                             | 7                             | 8                             | 9                             | 10                            | Do not know                   |
|------------------------------------|------------------------------|------------------------------|------------------------------|-------------------------------|-------------------------------|-------------------------------|-------------------------------|-------------------------------|-------------------------------|-------------------------------|-------------------------------|-------------------------------|
| 3 m2 per sow (below the EU norm)   | (2) <input type="checkbox"/> | (3) <input type="checkbox"/> | (4) <input type="checkbox"/> | (12) <input type="checkbox"/> | (13) <input type="checkbox"/> | (14) <input type="checkbox"/> | (15) <input type="checkbox"/> | (16) <input type="checkbox"/> | (17) <input type="checkbox"/> | (18) <input type="checkbox"/> | (19) <input type="checkbox"/> | (20) <input type="checkbox"/> |
| 4 m2 per sow (EU norm)             | (2) <input type="checkbox"/> | (3) <input type="checkbox"/> | (4) <input type="checkbox"/> | (12) <input type="checkbox"/> | (13) <input type="checkbox"/> | (14) <input type="checkbox"/> | (15) <input type="checkbox"/> | (16) <input type="checkbox"/> | (17) <input type="checkbox"/> | (18) <input type="checkbox"/> | (19) <input type="checkbox"/> | (20) <input type="checkbox"/> |
| 6 m2 per soW                       | (2) <input type="checkbox"/> | (3) <input type="checkbox"/> | (4) <input type="checkbox"/> | (12) <input type="checkbox"/> | (13) <input type="checkbox"/> | (14) <input type="checkbox"/> | (15) <input type="checkbox"/> | (16) <input type="checkbox"/> | (17) <input type="checkbox"/> | (18) <input type="checkbox"/> | (19) <input type="checkbox"/> | (20) <input type="checkbox"/> |
| 7.5 m2 per sow                     | (2) <input type="checkbox"/> | (3) <input type="checkbox"/> | (4) <input type="checkbox"/> | (12) <input type="checkbox"/> | (13) <input type="checkbox"/> | (14) <input type="checkbox"/> | (15) <input type="checkbox"/> | (16) <input type="checkbox"/> | (17) <input type="checkbox"/> | (18) <input type="checkbox"/> | (19) <input type="checkbox"/> | (20) <input type="checkbox"/> |
| 10 m2 per sow                      | (2) <input type="checkbox"/> | (3) <input type="checkbox"/> | (4) <input type="checkbox"/> | (12) <input type="checkbox"/> | (13) <input type="checkbox"/> | (14) <input type="checkbox"/> | (15) <input type="checkbox"/> | (16) <input type="checkbox"/> | (17) <input type="checkbox"/> | (18) <input type="checkbox"/> | (19) <input type="checkbox"/> | (20) <input type="checkbox"/> |
| 10 m2 per sow, with outdoor access | (2) <input type="checkbox"/> | (3) <input type="checkbox"/> | (4) <input type="checkbox"/> | (12) <input type="checkbox"/> | (13) <input type="checkbox"/> | (14) <input type="checkbox"/> | (15) <input type="checkbox"/> | (16) <input type="checkbox"/> | (17) <input type="checkbox"/> | (18) <input type="checkbox"/> | (19) <input type="checkbox"/> | (20) <input type="checkbox"/> |

What score would you give for sow welfare in a production system with the following space requirements for sows in group housing? The scale is from 0 to 10 where 0 represents minimal welfare for the sow and 10 represents the best possible welfare for the sow.

|                                                                         | 0                            | 1                            | 2                            | 3                             | 4                             | 5                             | 6                             | 7                             | 8                             | 9                             | 10                            | Do not know                   |
|-------------------------------------------------------------------------|------------------------------|------------------------------|------------------------------|-------------------------------|-------------------------------|-------------------------------|-------------------------------|-------------------------------|-------------------------------|-------------------------------|-------------------------------|-------------------------------|
| 1.5 m2 per sow (does not meet EU requirements)                          | (2) <input type="checkbox"/> | (3) <input type="checkbox"/> | (4) <input type="checkbox"/> | (12) <input type="checkbox"/> | (13) <input type="checkbox"/> | (14) <input type="checkbox"/> | (15) <input type="checkbox"/> | (16) <input type="checkbox"/> | (17) <input type="checkbox"/> | (18) <input type="checkbox"/> | (19) <input type="checkbox"/> | (20) <input type="checkbox"/> |
| 2.25 m2 per sow (meets EU requirements for groups under 40 sows; the EU | (2) <input type="checkbox"/> | (3) <input type="checkbox"/> | (4) <input type="checkbox"/> | (12) <input type="checkbox"/> | (13) <input type="checkbox"/> | (14) <input type="checkbox"/> | (15) <input type="checkbox"/> | (16) <input type="checkbox"/> | (17) <input type="checkbox"/> | (18) <input type="checkbox"/> | (19) <input type="checkbox"/> | (20) <input type="checkbox"/> |

|                                                  | 0                            | 1                            | 2                            | 3                             | 4                             | 5                             | 6                             | 7                             | 8                             | 9                             | 10                            | Do not know                   |
|--------------------------------------------------|------------------------------|------------------------------|------------------------------|-------------------------------|-------------------------------|-------------------------------|-------------------------------|-------------------------------|-------------------------------|-------------------------------|-------------------------------|-------------------------------|
| standard for groups of over 40 sows is 2.025 m2) |                              |                              |                              |                               |                               |                               |                               |                               |                               |                               |                               |                               |
| 2.5 m2 per sow                                   | (2) <input type="checkbox"/> | (3) <input type="checkbox"/> | (4) <input type="checkbox"/> | (12) <input type="checkbox"/> | (13) <input type="checkbox"/> | (14) <input type="checkbox"/> | (15) <input type="checkbox"/> | (16) <input type="checkbox"/> | (17) <input type="checkbox"/> | (18) <input type="checkbox"/> | (19) <input type="checkbox"/> | (20) <input type="checkbox"/> |
| 2.8 m2 per sow                                   | (2) <input type="checkbox"/> | (3) <input type="checkbox"/> | (4) <input type="checkbox"/> | (12) <input type="checkbox"/> | (13) <input type="checkbox"/> | (14) <input type="checkbox"/> | (15) <input type="checkbox"/> | (16) <input type="checkbox"/> | (17) <input type="checkbox"/> | (18) <input type="checkbox"/> | (19) <input type="checkbox"/> | (20) <input type="checkbox"/> |
| 3 m2 per sow                                     | (2) <input type="checkbox"/> | (3) <input type="checkbox"/> | (4) <input type="checkbox"/> | (12) <input type="checkbox"/> | (13) <input type="checkbox"/> | (14) <input type="checkbox"/> | (15) <input type="checkbox"/> | (16) <input type="checkbox"/> | (17) <input type="checkbox"/> | (18) <input type="checkbox"/> | (19) <input type="checkbox"/> | (20) <input type="checkbox"/> |
| 3 m2 per sow, with outdoor access                | (2) <input type="checkbox"/> | (3) <input type="checkbox"/> | (4) <input type="checkbox"/> | (12) <input type="checkbox"/> | (13) <input type="checkbox"/> | (14) <input type="checkbox"/> | (15) <input type="checkbox"/> | (16) <input type="checkbox"/> | (17) <input type="checkbox"/> | (18) <input type="checkbox"/> | (19) <input type="checkbox"/> | (20) <input type="checkbox"/> |

**What score would you give for sow welfare in a production system with the following access to nest-building material? The scale is from 0 to 10 where 0 represents minimal welfare for the sow and 10 represents the best possible welfare for the sow.**

|                                                                                                                                                                             | 0                            | 1                            | 2                            | 3                             | 4                             | 5                             | 6                             | 7                             | 8                             | 9                             | 10                            | Do not know                   |
|-----------------------------------------------------------------------------------------------------------------------------------------------------------------------------|------------------------------|------------------------------|------------------------------|-------------------------------|-------------------------------|-------------------------------|-------------------------------|-------------------------------|-------------------------------|-------------------------------|-------------------------------|-------------------------------|
| Sows are not given any nest-building material (does not meet EU requirements)                                                                                               | (2) <input type="checkbox"/> | (3) <input type="checkbox"/> | (4) <input type="checkbox"/> | (12) <input type="checkbox"/> | (13) <input type="checkbox"/> | (14) <input type="checkbox"/> | (15) <input type="checkbox"/> | (16) <input type="checkbox"/> | (17) <input type="checkbox"/> | (18) <input type="checkbox"/> | (19) <input type="checkbox"/> | (20) <input type="checkbox"/> |
| The week before farrowing, sows are provided with appropriate nest-building material unless it is technically not possible due to the slurry system (meets EU requirements) | (2) <input type="checkbox"/> | (3) <input type="checkbox"/> | (4) <input type="checkbox"/> | (12) <input type="checkbox"/> | (13) <input type="checkbox"/> | (14) <input type="checkbox"/> | (15) <input type="checkbox"/> | (16) <input type="checkbox"/> | (17) <input type="checkbox"/> | (18) <input type="checkbox"/> | (19) <input type="checkbox"/> | (20) <input type="checkbox"/> |
| The week before farrowing, sows are provided with appropriate nest-building material (no dispensations)                                                                     | (2) <input type="checkbox"/> | (3) <input type="checkbox"/> | (4) <input type="checkbox"/> | (12) <input type="checkbox"/> | (13) <input type="checkbox"/> | (14) <input type="checkbox"/> | (15) <input type="checkbox"/> | (16) <input type="checkbox"/> | (17) <input type="checkbox"/> | (18) <input type="checkbox"/> | (19) <input type="checkbox"/> | (20) <input type="checkbox"/> |

|   |   |   |   |   |   |   |   |   |   |    |             |
|---|---|---|---|---|---|---|---|---|---|----|-------------|
| 0 | 1 | 2 | 3 | 4 | 5 | 6 | 7 | 8 | 9 | 10 | Do not know |
|---|---|---|---|---|---|---|---|---|---|----|-------------|

The week before farrowing, sows are provided with plenty of nest-building material (no dispensations)

|     |                          |     |                          |     |                          |      |                          |      |                          |      |                          |      |                          |      |                          |      |                          |      |                          |      |                          |      |                          |
|-----|--------------------------|-----|--------------------------|-----|--------------------------|------|--------------------------|------|--------------------------|------|--------------------------|------|--------------------------|------|--------------------------|------|--------------------------|------|--------------------------|------|--------------------------|------|--------------------------|
| (2) | <input type="checkbox"/> | (3) | <input type="checkbox"/> | (4) | <input type="checkbox"/> | (12) | <input type="checkbox"/> | (13) | <input type="checkbox"/> | (14) | <input type="checkbox"/> | (15) | <input type="checkbox"/> | (16) | <input type="checkbox"/> | (17) | <input type="checkbox"/> | (18) | <input type="checkbox"/> | (19) | <input type="checkbox"/> | (20) | <input type="checkbox"/> |
|-----|--------------------------|-----|--------------------------|-----|--------------------------|------|--------------------------|------|--------------------------|------|--------------------------|------|--------------------------|------|--------------------------|------|--------------------------|------|--------------------------|------|--------------------------|------|--------------------------|

**What score would you give for sow welfare in a production system with the following practice for weaning? The scale is from 0 to 10 where 0 represents minimal welfare for the sow and 10 represents the best possible welfare for the sow.**

**Note: The welfare of the piglets in this production system is addressed in another question.**

|   |   |   |   |   |   |   |   |   |   |    |             |
|---|---|---|---|---|---|---|---|---|---|----|-------------|
| 0 | 1 | 2 | 3 | 4 | 5 | 6 | 7 | 8 | 9 | 10 | Do not know |
|---|---|---|---|---|---|---|---|---|---|----|-------------|

Piglets are weaned after 14 days (does not meet EU requirements)

|     |                          |     |                          |     |                          |      |                          |      |                          |      |                          |      |                          |      |                          |      |                          |      |                          |      |                          |      |                          |
|-----|--------------------------|-----|--------------------------|-----|--------------------------|------|--------------------------|------|--------------------------|------|--------------------------|------|--------------------------|------|--------------------------|------|--------------------------|------|--------------------------|------|--------------------------|------|--------------------------|
| (2) | <input type="checkbox"/> | (3) | <input type="checkbox"/> | (4) | <input type="checkbox"/> | (12) | <input type="checkbox"/> | (13) | <input type="checkbox"/> | (14) | <input type="checkbox"/> | (15) | <input type="checkbox"/> | (16) | <input type="checkbox"/> | (17) | <input type="checkbox"/> | (18) | <input type="checkbox"/> | (19) | <input type="checkbox"/> | (20) | <input type="checkbox"/> |
|-----|--------------------------|-----|--------------------------|-----|--------------------------|------|--------------------------|------|--------------------------|------|--------------------------|------|--------------------------|------|--------------------------|------|--------------------------|------|--------------------------|------|--------------------------|------|--------------------------|

Piglets are weaned after 21 days (EU requirement is 28 days but special dispensation to 21 days can be given)

|     |                          |     |                          |     |                          |      |                          |      |                          |      |                          |      |                          |      |                          |      |                          |      |                          |      |                          |      |                          |
|-----|--------------------------|-----|--------------------------|-----|--------------------------|------|--------------------------|------|--------------------------|------|--------------------------|------|--------------------------|------|--------------------------|------|--------------------------|------|--------------------------|------|--------------------------|------|--------------------------|
| (2) | <input type="checkbox"/> | (3) | <input type="checkbox"/> | (4) | <input type="checkbox"/> | (12) | <input type="checkbox"/> | (13) | <input type="checkbox"/> | (14) | <input type="checkbox"/> | (15) | <input type="checkbox"/> | (16) | <input type="checkbox"/> | (17) | <input type="checkbox"/> | (18) | <input type="checkbox"/> | (19) | <input type="checkbox"/> | (20) | <input type="checkbox"/> |
|-----|--------------------------|-----|--------------------------|-----|--------------------------|------|--------------------------|------|--------------------------|------|--------------------------|------|--------------------------|------|--------------------------|------|--------------------------|------|--------------------------|------|--------------------------|------|--------------------------|

Piglets are weaned after 28 days

|     |                          |     |                          |     |                          |      |                          |      |                          |      |                          |      |                          |      |                          |      |                          |      |                          |      |                          |      |                          |
|-----|--------------------------|-----|--------------------------|-----|--------------------------|------|--------------------------|------|--------------------------|------|--------------------------|------|--------------------------|------|--------------------------|------|--------------------------|------|--------------------------|------|--------------------------|------|--------------------------|
| (2) | <input type="checkbox"/> | (3) | <input type="checkbox"/> | (4) | <input type="checkbox"/> | (12) | <input type="checkbox"/> | (13) | <input type="checkbox"/> | (14) | <input type="checkbox"/> | (15) | <input type="checkbox"/> | (16) | <input type="checkbox"/> | (17) | <input type="checkbox"/> | (18) | <input type="checkbox"/> | (19) | <input type="checkbox"/> | (20) | <input type="checkbox"/> |
|-----|--------------------------|-----|--------------------------|-----|--------------------------|------|--------------------------|------|--------------------------|------|--------------------------|------|--------------------------|------|--------------------------|------|--------------------------|------|--------------------------|------|--------------------------|------|--------------------------|

Piglets are weaned after 30 days

|     |                          |     |                          |     |                          |      |                          |      |                          |      |                          |      |                          |      |                          |      |                          |      |                          |      |                          |      |                          |
|-----|--------------------------|-----|--------------------------|-----|--------------------------|------|--------------------------|------|--------------------------|------|--------------------------|------|--------------------------|------|--------------------------|------|--------------------------|------|--------------------------|------|--------------------------|------|--------------------------|
| (2) | <input type="checkbox"/> | (3) | <input type="checkbox"/> | (4) | <input type="checkbox"/> | (12) | <input type="checkbox"/> | (13) | <input type="checkbox"/> | (14) | <input type="checkbox"/> | (15) | <input type="checkbox"/> | (16) | <input type="checkbox"/> | (17) | <input type="checkbox"/> | (18) | <input type="checkbox"/> | (19) | <input type="checkbox"/> | (20) | <input type="checkbox"/> |
|-----|--------------------------|-----|--------------------------|-----|--------------------------|------|--------------------------|------|--------------------------|------|--------------------------|------|--------------------------|------|--------------------------|------|--------------------------|------|--------------------------|------|--------------------------|------|--------------------------|

Piglets are weaned after 40 days

|     |                          |     |                          |     |                          |      |                          |      |                          |      |                          |      |                          |      |                          |      |                          |      |                          |      |                          |      |                          |
|-----|--------------------------|-----|--------------------------|-----|--------------------------|------|--------------------------|------|--------------------------|------|--------------------------|------|--------------------------|------|--------------------------|------|--------------------------|------|--------------------------|------|--------------------------|------|--------------------------|
| (2) | <input type="checkbox"/> | (3) | <input type="checkbox"/> | (4) | <input type="checkbox"/> | (12) | <input type="checkbox"/> | (13) | <input type="checkbox"/> | (14) | <input type="checkbox"/> | (15) | <input type="checkbox"/> | (16) | <input type="checkbox"/> | (17) | <input type="checkbox"/> | (18) | <input type="checkbox"/> | (19) | <input type="checkbox"/> | (20) | <input type="checkbox"/> |
|-----|--------------------------|-----|--------------------------|-----|--------------------------|------|--------------------------|------|--------------------------|------|--------------------------|------|--------------------------|------|--------------------------|------|--------------------------|------|--------------------------|------|--------------------------|------|--------------------------|

Piglets are weaned after 49 days

|     |                          |     |                          |     |                          |      |                          |      |                          |      |                          |      |                          |      |                          |      |                          |      |                          |      |                          |      |                          |
|-----|--------------------------|-----|--------------------------|-----|--------------------------|------|--------------------------|------|--------------------------|------|--------------------------|------|--------------------------|------|--------------------------|------|--------------------------|------|--------------------------|------|--------------------------|------|--------------------------|
| (2) | <input type="checkbox"/> | (3) | <input type="checkbox"/> | (4) | <input type="checkbox"/> | (12) | <input type="checkbox"/> | (13) | <input type="checkbox"/> | (14) | <input type="checkbox"/> | (15) | <input type="checkbox"/> | (16) | <input type="checkbox"/> | (17) | <input type="checkbox"/> | (18) | <input type="checkbox"/> | (19) | <input type="checkbox"/> | (20) | <input type="checkbox"/> |
|-----|--------------------------|-----|--------------------------|-----|--------------------------|------|--------------------------|------|--------------------------|------|--------------------------|------|--------------------------|------|--------------------------|------|--------------------------|------|--------------------------|------|--------------------------|------|--------------------------|

Piglets are weaned after 70 days

|     |                          |     |                          |     |                          |      |                          |      |                          |      |                          |      |                          |      |                          |      |                          |      |                          |      |                          |      |                          |
|-----|--------------------------|-----|--------------------------|-----|--------------------------|------|--------------------------|------|--------------------------|------|--------------------------|------|--------------------------|------|--------------------------|------|--------------------------|------|--------------------------|------|--------------------------|------|--------------------------|
| (2) | <input type="checkbox"/> | (3) | <input type="checkbox"/> | (4) | <input type="checkbox"/> | (12) | <input type="checkbox"/> | (13) | <input type="checkbox"/> | (14) | <input type="checkbox"/> | (15) | <input type="checkbox"/> | (16) | <input type="checkbox"/> | (17) | <input type="checkbox"/> | (18) | <input type="checkbox"/> | (19) | <input type="checkbox"/> | (20) | <input type="checkbox"/> |
|-----|--------------------------|-----|--------------------------|-----|--------------------------|------|--------------------------|------|--------------------------|------|--------------------------|------|--------------------------|------|--------------------------|------|--------------------------|------|--------------------------|------|--------------------------|------|--------------------------|

## PIGLETS

What score would you give for piglet welfare in a production system where the sow is confined for certain periods with different space requirements? The scale is from 0 to 10 where 0 represents minimal welfare for the piglet and 10 represents the best possible welfare for the piglet regarding this feature.

**Note:** The welfare of the sow in this production system is addressed in another question.

**Piglet welfare when the sow is confined in the farrowing pen:**

|                                                | 0                            | 1                            | 2                            | 3                             | 4                             | 5                             | 6                             | 7                             | 8                             | 9                             | 10                            | Do not know                   |
|------------------------------------------------|------------------------------|------------------------------|------------------------------|-------------------------------|-------------------------------|-------------------------------|-------------------------------|-------------------------------|-------------------------------|-------------------------------|-------------------------------|-------------------------------|
| With pens of 4 m <sup>2</sup> (as per EU norm) | (2) <input type="checkbox"/> | (3) <input type="checkbox"/> | (4) <input type="checkbox"/> | (12) <input type="checkbox"/> | (13) <input type="checkbox"/> | (14) <input type="checkbox"/> | (15) <input type="checkbox"/> | (16) <input type="checkbox"/> | (17) <input type="checkbox"/> | (18) <input type="checkbox"/> | (19) <input type="checkbox"/> | (20) <input type="checkbox"/> |
| With pens of 6 m <sup>2</sup>                  | (2) <input type="checkbox"/> | (3) <input type="checkbox"/> | (4) <input type="checkbox"/> | (12) <input type="checkbox"/> | (13) <input type="checkbox"/> | (14) <input type="checkbox"/> | (15) <input type="checkbox"/> | (16) <input type="checkbox"/> | (17) <input type="checkbox"/> | (18) <input type="checkbox"/> | (19) <input type="checkbox"/> | (20) <input type="checkbox"/> |
| With pens of 7.5 m <sup>2</sup>                | (2) <input type="checkbox"/> | (3) <input type="checkbox"/> | (4) <input type="checkbox"/> | (12) <input type="checkbox"/> | (13) <input type="checkbox"/> | (14) <input type="checkbox"/> | (15) <input type="checkbox"/> | (16) <input type="checkbox"/> | (17) <input type="checkbox"/> | (18) <input type="checkbox"/> | (19) <input type="checkbox"/> | (20) <input type="checkbox"/> |
| With pens of 10 m <sup>2</sup>                 | (2) <input type="checkbox"/> | (3) <input type="checkbox"/> | (4) <input type="checkbox"/> | (12) <input type="checkbox"/> | (13) <input type="checkbox"/> | (14) <input type="checkbox"/> | (15) <input type="checkbox"/> | (16) <input type="checkbox"/> | (17) <input type="checkbox"/> | (18) <input type="checkbox"/> | (19) <input type="checkbox"/> | (20) <input type="checkbox"/> |

**Piglet welfare when the sow is loose in the farrowing pen, except for 4-5 days after farrowing:**

|                                                | 0                            | 1                            | 2                            | 3                             | 4                             | 5                             | 6                             | 7                             | 8                             | 9                             | 10                            | Do not know                   |
|------------------------------------------------|------------------------------|------------------------------|------------------------------|-------------------------------|-------------------------------|-------------------------------|-------------------------------|-------------------------------|-------------------------------|-------------------------------|-------------------------------|-------------------------------|
| With pens of 4 m <sup>2</sup> (as per EU norm) | (2) <input type="checkbox"/> | (3) <input type="checkbox"/> | (4) <input type="checkbox"/> | (12) <input type="checkbox"/> | (13) <input type="checkbox"/> | (14) <input type="checkbox"/> | (15) <input type="checkbox"/> | (16) <input type="checkbox"/> | (17) <input type="checkbox"/> | (18) <input type="checkbox"/> | (19) <input type="checkbox"/> | (20) <input type="checkbox"/> |
| With pens of 6 m <sup>2</sup>                  | (2) <input type="checkbox"/> | (3) <input type="checkbox"/> | (4) <input type="checkbox"/> | (12) <input type="checkbox"/> | (13) <input type="checkbox"/> | (14) <input type="checkbox"/> | (15) <input type="checkbox"/> | (16) <input type="checkbox"/> | (17) <input type="checkbox"/> | (18) <input type="checkbox"/> | (19) <input type="checkbox"/> | (20) <input type="checkbox"/> |
| With pens of 7.5 m <sup>2</sup>                | (2) <input type="checkbox"/> | (3) <input type="checkbox"/> | (4) <input type="checkbox"/> | (12) <input type="checkbox"/> | (13) <input type="checkbox"/> | (14) <input type="checkbox"/> | (15) <input type="checkbox"/> | (16) <input type="checkbox"/> | (17) <input type="checkbox"/> | (18) <input type="checkbox"/> | (19) <input type="checkbox"/> | (20) <input type="checkbox"/> |
| With pens of 10 m <sup>2</sup>                 | (2) <input type="checkbox"/> | (3) <input type="checkbox"/> | (4) <input type="checkbox"/> | (12) <input type="checkbox"/> | (13) <input type="checkbox"/> | (14) <input type="checkbox"/> | (15) <input type="checkbox"/> | (16) <input type="checkbox"/> | (17) <input type="checkbox"/> | (18) <input type="checkbox"/> | (19) <input type="checkbox"/> | (20) <input type="checkbox"/> |

**Piglet welfare when the sow is loose in the farrowing pen, except for 2-3 days after farrowing:**

|                                                | 0                            | 1                            | 2                            | 3                             | 4                             | 5                             | 6                             | 7                             | 8                             | 9                             | 10                            | Do not know                   |
|------------------------------------------------|------------------------------|------------------------------|------------------------------|-------------------------------|-------------------------------|-------------------------------|-------------------------------|-------------------------------|-------------------------------|-------------------------------|-------------------------------|-------------------------------|
| With pens of 4 m <sup>2</sup> (as per EU norm) | (2) <input type="checkbox"/> | (3) <input type="checkbox"/> | (4) <input type="checkbox"/> | (12) <input type="checkbox"/> | (13) <input type="checkbox"/> | (14) <input type="checkbox"/> | (15) <input type="checkbox"/> | (16) <input type="checkbox"/> | (17) <input type="checkbox"/> | (18) <input type="checkbox"/> | (19) <input type="checkbox"/> | (20) <input type="checkbox"/> |
| With pens of 6 m <sup>2</sup>                  | (2) <input type="checkbox"/> | (3) <input type="checkbox"/> | (4) <input type="checkbox"/> | (12) <input type="checkbox"/> | (13) <input type="checkbox"/> | (14) <input type="checkbox"/> | (15) <input type="checkbox"/> | (16) <input type="checkbox"/> | (17) <input type="checkbox"/> | (18) <input type="checkbox"/> | (19) <input type="checkbox"/> | (20) <input type="checkbox"/> |
| With pens of 7.5 m <sup>2</sup>                | (2) <input type="checkbox"/> | (3) <input type="checkbox"/> | (4) <input type="checkbox"/> | (12) <input type="checkbox"/> | (13) <input type="checkbox"/> | (14) <input type="checkbox"/> | (15) <input type="checkbox"/> | (16) <input type="checkbox"/> | (17) <input type="checkbox"/> | (18) <input type="checkbox"/> | (19) <input type="checkbox"/> | (20) <input type="checkbox"/> |
| With pens of 10 m <sup>2</sup>                 | (2) <input type="checkbox"/> | (3) <input type="checkbox"/> | (4) <input type="checkbox"/> | (12) <input type="checkbox"/> | (13) <input type="checkbox"/> | (14) <input type="checkbox"/> | (15) <input type="checkbox"/> | (16) <input type="checkbox"/> | (17) <input type="checkbox"/> | (18) <input type="checkbox"/> | (19) <input type="checkbox"/> | (20) <input type="checkbox"/> |

**Piglet welfare when the sow is loose in the all times:**

|                                                      | 0                            | 1                            | 2                            | 3                             | 4                             | 5                             | 6                             | 7                             | 8                             | 9                             | 10                            | Do not know                   |
|------------------------------------------------------|------------------------------|------------------------------|------------------------------|-------------------------------|-------------------------------|-------------------------------|-------------------------------|-------------------------------|-------------------------------|-------------------------------|-------------------------------|-------------------------------|
| With pens of 4 m <sup>2</sup> (as per EU norm)       | (2) <input type="checkbox"/> | (3) <input type="checkbox"/> | (4) <input type="checkbox"/> | (12) <input type="checkbox"/> | (13) <input type="checkbox"/> | (14) <input type="checkbox"/> | (15) <input type="checkbox"/> | (16) <input type="checkbox"/> | (17) <input type="checkbox"/> | (18) <input type="checkbox"/> | (19) <input type="checkbox"/> | (20) <input type="checkbox"/> |
| With pens of 6 m <sup>2</sup>                        | (2) <input type="checkbox"/> | (3) <input type="checkbox"/> | (4) <input type="checkbox"/> | (12) <input type="checkbox"/> | (13) <input type="checkbox"/> | (14) <input type="checkbox"/> | (15) <input type="checkbox"/> | (16) <input type="checkbox"/> | (17) <input type="checkbox"/> | (18) <input type="checkbox"/> | (19) <input type="checkbox"/> | (20) <input type="checkbox"/> |
| With pens of 7.5 m <sup>2</sup>                      | (2) <input type="checkbox"/> | (3) <input type="checkbox"/> | (4) <input type="checkbox"/> | (12) <input type="checkbox"/> | (13) <input type="checkbox"/> | (14) <input type="checkbox"/> | (15) <input type="checkbox"/> | (16) <input type="checkbox"/> | (17) <input type="checkbox"/> | (18) <input type="checkbox"/> | (19) <input type="checkbox"/> | (20) <input type="checkbox"/> |
| With pens of 10 m <sup>2</sup>                       | (2) <input type="checkbox"/> | (3) <input type="checkbox"/> | (4) <input type="checkbox"/> | (12) <input type="checkbox"/> | (13) <input type="checkbox"/> | (14) <input type="checkbox"/> | (15) <input type="checkbox"/> | (16) <input type="checkbox"/> | (17) <input type="checkbox"/> | (18) <input type="checkbox"/> | (19) <input type="checkbox"/> | (20) <input type="checkbox"/> |
| With the sow loose in farrow hut with outdoor access | (2) <input type="checkbox"/> | (3) <input type="checkbox"/> | (4) <input type="checkbox"/> | (12) <input type="checkbox"/> | (13) <input type="checkbox"/> | (14) <input type="checkbox"/> | (15) <input type="checkbox"/> | (16) <input type="checkbox"/> | (17) <input type="checkbox"/> | (18) <input type="checkbox"/> | (19) <input type="checkbox"/> | (20) <input type="checkbox"/> |

**What score would you give for piglet welfare in a production system with the following practice for weaning? The scale is from 0 to 10 where 0 represents minimal welfare for the piglet and 10 represents the best possible welfare for the piglet.**

**Note: The welfare of the sow in this production system is addressed in another question.**

|                                                                                                               | 0                            | 1                            | 2                            | 3                             | 4                             | 5                             | 6                             | 7                             | 8                             | 9                             | 10                            | Do not know                   |
|---------------------------------------------------------------------------------------------------------------|------------------------------|------------------------------|------------------------------|-------------------------------|-------------------------------|-------------------------------|-------------------------------|-------------------------------|-------------------------------|-------------------------------|-------------------------------|-------------------------------|
| Piglets are weaned after 14 days (does not meet EU requirements)                                              | (2) <input type="checkbox"/> | (3) <input type="checkbox"/> | (4) <input type="checkbox"/> | (12) <input type="checkbox"/> | (13) <input type="checkbox"/> | (14) <input type="checkbox"/> | (15) <input type="checkbox"/> | (16) <input type="checkbox"/> | (17) <input type="checkbox"/> | (18) <input type="checkbox"/> | (19) <input type="checkbox"/> | (20) <input type="checkbox"/> |
| Piglets are weaned after 21 days (EU requirement is 28 days but special dispensation to 21 days can be given) | (2) <input type="checkbox"/> | (3) <input type="checkbox"/> | (4) <input type="checkbox"/> | (12) <input type="checkbox"/> | (13) <input type="checkbox"/> | (14) <input type="checkbox"/> | (15) <input type="checkbox"/> | (16) <input type="checkbox"/> | (17) <input type="checkbox"/> | (18) <input type="checkbox"/> | (19) <input type="checkbox"/> | (20) <input type="checkbox"/> |
| Piglets are weaned after 28 days                                                                              | (2) <input type="checkbox"/> | (3) <input type="checkbox"/> | (4) <input type="checkbox"/> | (12) <input type="checkbox"/> | (13) <input type="checkbox"/> | (14) <input type="checkbox"/> | (15) <input type="checkbox"/> | (16) <input type="checkbox"/> | (17) <input type="checkbox"/> | (18) <input type="checkbox"/> | (19) <input type="checkbox"/> | (20) <input type="checkbox"/> |
| Piglets are weaned after 30 days                                                                              | (2) <input type="checkbox"/> | (3) <input type="checkbox"/> | (4) <input type="checkbox"/> | (12) <input type="checkbox"/> | (13) <input type="checkbox"/> | (14) <input type="checkbox"/> | (15) <input type="checkbox"/> | (16) <input type="checkbox"/> | (17) <input type="checkbox"/> | (18) <input type="checkbox"/> | (19) <input type="checkbox"/> | (20) <input type="checkbox"/> |
| Piglets are weaned after 40 days                                                                              | (2) <input type="checkbox"/> | (3) <input type="checkbox"/> | (4) <input type="checkbox"/> | (12) <input type="checkbox"/> | (13) <input type="checkbox"/> | (14) <input type="checkbox"/> | (15) <input type="checkbox"/> | (16) <input type="checkbox"/> | (17) <input type="checkbox"/> | (18) <input type="checkbox"/> | (19) <input type="checkbox"/> | (20) <input type="checkbox"/> |
| Piglets are weaned after 49 days                                                                              | (2) <input type="checkbox"/> | (3) <input type="checkbox"/> | (4) <input type="checkbox"/> | (12) <input type="checkbox"/> | (13) <input type="checkbox"/> | (14) <input type="checkbox"/> | (15) <input type="checkbox"/> | (16) <input type="checkbox"/> | (17) <input type="checkbox"/> | (18) <input type="checkbox"/> | (19) <input type="checkbox"/> | (20) <input type="checkbox"/> |
| Piglets are weaned after 70 days                                                                              | (2) <input type="checkbox"/> | (3) <input type="checkbox"/> | (4) <input type="checkbox"/> | (12) <input type="checkbox"/> | (13) <input type="checkbox"/> | (14) <input type="checkbox"/> | (15) <input type="checkbox"/> | (16) <input type="checkbox"/> | (17) <input type="checkbox"/> | (18) <input type="checkbox"/> | (19) <input type="checkbox"/> | (20) <input type="checkbox"/> |

**What score would you give for piglet welfare in a production system with the following practice for tail docking? The scale is from 0 to 10 where 0 represents minimal welfare for the piglet and 10 represents the best possible welfare for the piglet.**

|                                                                                            | 0                            | 1                            | 2                            | 3                             | 4                             | 5                             | 6                             | 7                             | 8                             | 9                             | 10                            | Do not know                   |
|--------------------------------------------------------------------------------------------|------------------------------|------------------------------|------------------------------|-------------------------------|-------------------------------|-------------------------------|-------------------------------|-------------------------------|-------------------------------|-------------------------------|-------------------------------|-------------------------------|
| Piglets are tail docked without pain relief or anaesthesia (does not meet EU requirements) | (2) <input type="checkbox"/> | (3) <input type="checkbox"/> | (4) <input type="checkbox"/> | (12) <input type="checkbox"/> | (13) <input type="checkbox"/> | (14) <input type="checkbox"/> | (15) <input type="checkbox"/> | (16) <input type="checkbox"/> | (17) <input type="checkbox"/> | (18) <input type="checkbox"/> | (19) <input type="checkbox"/> | (20) <input type="checkbox"/> |
| Until day 4, piglets are tail docked without pain relief. After day 4, piglets that are    | (2) <input type="checkbox"/> | (3) <input type="checkbox"/> | (4) <input type="checkbox"/> | (12) <input type="checkbox"/> | (13) <input type="checkbox"/> | (14) <input type="checkbox"/> | (15) <input type="checkbox"/> | (16) <input type="checkbox"/> | (17) <input type="checkbox"/> | (18) <input type="checkbox"/> | (19) <input type="checkbox"/> | (20) <input type="checkbox"/> |



|   |   |   |   |   |   |   |   |   |   |    |             |
|---|---|---|---|---|---|---|---|---|---|----|-------------|
| 0 | 1 | 2 | 3 | 4 | 5 | 6 | 7 | 8 | 9 | 10 | Do not know |
|---|---|---|---|---|---|---|---|---|---|----|-------------|

tail docked receive general pain relief and full anaesthesia (meets EU requirements)

Piglets are only tail docked with general pain relief and full anaesthesia

|     |                          |     |                          |     |                          |      |                          |      |                          |      |                          |      |                          |      |                          |      |                          |      |                          |      |                          |      |                          |
|-----|--------------------------|-----|--------------------------|-----|--------------------------|------|--------------------------|------|--------------------------|------|--------------------------|------|--------------------------|------|--------------------------|------|--------------------------|------|--------------------------|------|--------------------------|------|--------------------------|
| (2) | <input type="checkbox"/> | (3) | <input type="checkbox"/> | (4) | <input type="checkbox"/> | (12) | <input type="checkbox"/> | (13) | <input type="checkbox"/> | (14) | <input type="checkbox"/> | (15) | <input type="checkbox"/> | (16) | <input type="checkbox"/> | (17) | <input type="checkbox"/> | (18) | <input type="checkbox"/> | (19) | <input type="checkbox"/> | (20) | <input type="checkbox"/> |
|-----|--------------------------|-----|--------------------------|-----|--------------------------|------|--------------------------|------|--------------------------|------|--------------------------|------|--------------------------|------|--------------------------|------|--------------------------|------|--------------------------|------|--------------------------|------|--------------------------|

Piglets are not tail docked and there are no requirements to reduce tail biting

|     |                          |     |                          |     |                          |      |                          |      |                          |      |                          |      |                          |      |                          |      |                          |      |                          |      |                          |      |                          |
|-----|--------------------------|-----|--------------------------|-----|--------------------------|------|--------------------------|------|--------------------------|------|--------------------------|------|--------------------------|------|--------------------------|------|--------------------------|------|--------------------------|------|--------------------------|------|--------------------------|
| (2) | <input type="checkbox"/> | (3) | <input type="checkbox"/> | (4) | <input type="checkbox"/> | (12) | <input type="checkbox"/> | (13) | <input type="checkbox"/> | (14) | <input type="checkbox"/> | (15) | <input type="checkbox"/> | (16) | <input type="checkbox"/> | (17) | <input type="checkbox"/> | (18) | <input type="checkbox"/> | (19) | <input type="checkbox"/> | (20) | <input type="checkbox"/> |
|-----|--------------------------|-----|--------------------------|-----|--------------------------|------|--------------------------|------|--------------------------|------|--------------------------|------|--------------------------|------|--------------------------|------|--------------------------|------|--------------------------|------|--------------------------|------|--------------------------|

Piglets are not tail docked and tail biting is only tolerated to a limited degree

|     |                          |     |                          |     |                          |      |                          |      |                          |      |                          |      |                          |      |                          |      |                          |      |                          |      |                          |      |                          |
|-----|--------------------------|-----|--------------------------|-----|--------------------------|------|--------------------------|------|--------------------------|------|--------------------------|------|--------------------------|------|--------------------------|------|--------------------------|------|--------------------------|------|--------------------------|------|--------------------------|
| (2) | <input type="checkbox"/> | (3) | <input type="checkbox"/> | (4) | <input type="checkbox"/> | (12) | <input type="checkbox"/> | (13) | <input type="checkbox"/> | (14) | <input type="checkbox"/> | (15) | <input type="checkbox"/> | (16) | <input type="checkbox"/> | (17) | <input type="checkbox"/> | (18) | <input type="checkbox"/> | (19) | <input type="checkbox"/> | (20) | <input type="checkbox"/> |
|-----|--------------------------|-----|--------------------------|-----|--------------------------|------|--------------------------|------|--------------------------|------|--------------------------|------|--------------------------|------|--------------------------|------|--------------------------|------|--------------------------|------|--------------------------|------|--------------------------|

**What score would you give for piglet welfare in a production system with the following practice for surgical castration? The scale is from 0 to 10 where 0 represents minimal welfare for the piglet and 10 represents the best possible welfare for the piglet.**

**Note: Include the effect on the welfare of the piglets relating to both the castration itself and to differences in behaviour in castrated and non-castrated boars**

|   |   |   |   |   |   |   |   |   |   |    |             |
|---|---|---|---|---|---|---|---|---|---|----|-------------|
| 0 | 1 | 2 | 3 | 4 | 5 | 6 | 7 | 8 | 9 | 10 | Do not know |
|---|---|---|---|---|---|---|---|---|---|----|-------------|

Piglets are surgically castrated without any anesthesia, analgesia or general pain relief (does not meet EU requirements)

|     |                          |     |                          |     |                          |      |                          |      |                          |      |                          |      |                          |      |                          |      |                          |      |                          |      |                          |      |                          |
|-----|--------------------------|-----|--------------------------|-----|--------------------------|------|--------------------------|------|--------------------------|------|--------------------------|------|--------------------------|------|--------------------------|------|--------------------------|------|--------------------------|------|--------------------------|------|--------------------------|
| (2) | <input type="checkbox"/> | (3) | <input type="checkbox"/> | (4) | <input type="checkbox"/> | (12) | <input type="checkbox"/> | (13) | <input type="checkbox"/> | (14) | <input type="checkbox"/> | (15) | <input type="checkbox"/> | (16) | <input type="checkbox"/> | (17) | <input type="checkbox"/> | (18) | <input type="checkbox"/> | (19) | <input type="checkbox"/> | (20) | <input type="checkbox"/> |
|-----|--------------------------|-----|--------------------------|-----|--------------------------|------|--------------------------|------|--------------------------|------|--------------------------|------|--------------------------|------|--------------------------|------|--------------------------|------|--------------------------|------|--------------------------|------|--------------------------|

Until day 7, piglets are surgically castrated without any anesthesia, analgesia or general pain relief. After day 7, piglets are castrated with

|     |                          |     |                          |     |                          |      |                          |      |                          |      |                          |      |                          |      |                          |      |                          |      |                          |      |                          |      |                          |
|-----|--------------------------|-----|--------------------------|-----|--------------------------|------|--------------------------|------|--------------------------|------|--------------------------|------|--------------------------|------|--------------------------|------|--------------------------|------|--------------------------|------|--------------------------|------|--------------------------|
| (2) | <input type="checkbox"/> | (3) | <input type="checkbox"/> | (4) | <input type="checkbox"/> | (12) | <input type="checkbox"/> | (13) | <input type="checkbox"/> | (14) | <input type="checkbox"/> | (15) | <input type="checkbox"/> | (16) | <input type="checkbox"/> | (17) | <input type="checkbox"/> | (18) | <input type="checkbox"/> | (19) | <input type="checkbox"/> | (20) | <input type="checkbox"/> |
|-----|--------------------------|-----|--------------------------|-----|--------------------------|------|--------------------------|------|--------------------------|------|--------------------------|------|--------------------------|------|--------------------------|------|--------------------------|------|--------------------------|------|--------------------------|------|--------------------------|

|                                                                                                                                                                                                                                        | 0                            | 1                            | 2                            | 3                             | 4                             | 5                             | 6                             | 7                             | 8                             | 9                             | 10                            | Do not know                   |
|----------------------------------------------------------------------------------------------------------------------------------------------------------------------------------------------------------------------------------------|------------------------------|------------------------------|------------------------------|-------------------------------|-------------------------------|-------------------------------|-------------------------------|-------------------------------|-------------------------------|-------------------------------|-------------------------------|-------------------------------|
| general pain relief (does not meet EU requirements)                                                                                                                                                                                    |                              |                              |                              |                               |                               |                               |                               |                               |                               |                               |                               |                               |
| Until day 7, piglets are surgically castrated without any anaesthesia, analgesia or general pain relief. After day 7, piglets are castrated with local analgesia via an injection and with general pain relief (meets EU requirements) | (2) <input type="checkbox"/> | (3) <input type="checkbox"/> | (4) <input type="checkbox"/> | (12) <input type="checkbox"/> | (13) <input type="checkbox"/> | (14) <input type="checkbox"/> | (15) <input type="checkbox"/> | (16) <input type="checkbox"/> | (17) <input type="checkbox"/> | (18) <input type="checkbox"/> | (19) <input type="checkbox"/> | (20) <input type="checkbox"/> |
| Until day 7, piglets are surgically castrated without any anaesthesia but with general pain relief. After day 7, piglets are castrated with local analgesia via an injection and with general pain relief                              | (2) <input type="checkbox"/> | (3) <input type="checkbox"/> | (4) <input type="checkbox"/> | (12) <input type="checkbox"/> | (13) <input type="checkbox"/> | (14) <input type="checkbox"/> | (15) <input type="checkbox"/> | (16) <input type="checkbox"/> | (17) <input type="checkbox"/> | (18) <input type="checkbox"/> | (19) <input type="checkbox"/> | (20) <input type="checkbox"/> |
| Piglets are only surgically castrated with local analgesia via an injection and with general pain relief                                                                                                                               | (2) <input type="checkbox"/> | (3) <input type="checkbox"/> | (4) <input type="checkbox"/> | (12) <input type="checkbox"/> | (13) <input type="checkbox"/> | (14) <input type="checkbox"/> | (15) <input type="checkbox"/> | (16) <input type="checkbox"/> | (17) <input type="checkbox"/> | (18) <input type="checkbox"/> | (19) <input type="checkbox"/> | (20) <input type="checkbox"/> |
| Piglets are only castrated with full anaesthesia through inhalation and with general pain relief                                                                                                                                       | (2) <input type="checkbox"/> | (3) <input type="checkbox"/> | (4) <input type="checkbox"/> | (12) <input type="checkbox"/> | (13) <input type="checkbox"/> | (14) <input type="checkbox"/> | (15) <input type="checkbox"/> | (16) <input type="checkbox"/> | (17) <input type="checkbox"/> | (18) <input type="checkbox"/> | (19) <input type="checkbox"/> | (20) <input type="checkbox"/> |
| Piglets are not castrated                                                                                                                                                                                                              | (2) <input type="checkbox"/> | (3) <input type="checkbox"/> | (4) <input type="checkbox"/> | (12) <input type="checkbox"/> | (13) <input type="checkbox"/> | (14) <input type="checkbox"/> | (15) <input type="checkbox"/> | (16) <input type="checkbox"/> | (17) <input type="checkbox"/> | (18) <input type="checkbox"/> | (19) <input type="checkbox"/> | (20) <input type="checkbox"/> |

## WEANERS AND FINISHERS

What score would you give for pig welfare in a production system with the following space requirements for smaller pigs of 25-30 kg? The scale is from 0 to 10 where 0 represents minimal welfare for the piglet and 10 represents the best possible welfare for the piglet

regarding this feature.

|                                                | 0                            | 1                            | 2                            | 3                             | 4                             | 5                             | 6                             | 7                             | 8                             | 9                             | 10                            | Do not know                   |
|------------------------------------------------|------------------------------|------------------------------|------------------------------|-------------------------------|-------------------------------|-------------------------------|-------------------------------|-------------------------------|-------------------------------|-------------------------------|-------------------------------|-------------------------------|
| 0.2 m2 per pig (does not meet EU requirements) | (2) <input type="checkbox"/> | (3) <input type="checkbox"/> | (4) <input type="checkbox"/> | (12) <input type="checkbox"/> | (13) <input type="checkbox"/> | (14) <input type="checkbox"/> | (15) <input type="checkbox"/> | (16) <input type="checkbox"/> | (17) <input type="checkbox"/> | (18) <input type="checkbox"/> | (19) <input type="checkbox"/> | (20) <input type="checkbox"/> |
| 0.3 m2 per pig (meets EU requirements)         | (2) <input type="checkbox"/> | (3) <input type="checkbox"/> | (4) <input type="checkbox"/> | (12) <input type="checkbox"/> | (13) <input type="checkbox"/> | (14) <input type="checkbox"/> | (15) <input type="checkbox"/> | (16) <input type="checkbox"/> | (17) <input type="checkbox"/> | (18) <input type="checkbox"/> | (19) <input type="checkbox"/> | (20) <input type="checkbox"/> |
| 0.4 m2 per pig                                 | (2) <input type="checkbox"/> | (3) <input type="checkbox"/> | (4) <input type="checkbox"/> | (12) <input type="checkbox"/> | (13) <input type="checkbox"/> | (14) <input type="checkbox"/> | (15) <input type="checkbox"/> | (16) <input type="checkbox"/> | (17) <input type="checkbox"/> | (18) <input type="checkbox"/> | (19) <input type="checkbox"/> | (20) <input type="checkbox"/> |
| 0.5 m2 per pig                                 | (2) <input type="checkbox"/> | (3) <input type="checkbox"/> | (4) <input type="checkbox"/> | (12) <input type="checkbox"/> | (13) <input type="checkbox"/> | (14) <input type="checkbox"/> | (15) <input type="checkbox"/> | (16) <input type="checkbox"/> | (17) <input type="checkbox"/> | (18) <input type="checkbox"/> | (19) <input type="checkbox"/> | (20) <input type="checkbox"/> |
| 1 m2 per pig                                   | (2) <input type="checkbox"/> | (3) <input type="checkbox"/> | (4) <input type="checkbox"/> | (12) <input type="checkbox"/> | (13) <input type="checkbox"/> | (14) <input type="checkbox"/> | (15) <input type="checkbox"/> | (16) <input type="checkbox"/> | (17) <input type="checkbox"/> | (18) <input type="checkbox"/> | (19) <input type="checkbox"/> | (20) <input type="checkbox"/> |
| 1 m2 per pig, with outdoor access              | (2) <input type="checkbox"/> | (3) <input type="checkbox"/> | (4) <input type="checkbox"/> | (12) <input type="checkbox"/> | (13) <input type="checkbox"/> | (14) <input type="checkbox"/> | (15) <input type="checkbox"/> | (16) <input type="checkbox"/> | (17) <input type="checkbox"/> | (18) <input type="checkbox"/> | (19) <input type="checkbox"/> | (20) <input type="checkbox"/> |

What score would you give for pig welfare in a production system with the following space requirements for finisher pigs of 100-110 kg? The scale is from 0 to 10 where 0 represents minimal welfare for the piglet and 10 represents the best possible welfare for the piglet.

|                                                | 0                            | 1                            | 2                            | 3                             | 4                             | 5                             | 6                             | 7                             | 8                             | 9                             | 10                            | Do not know                   |
|------------------------------------------------|------------------------------|------------------------------|------------------------------|-------------------------------|-------------------------------|-------------------------------|-------------------------------|-------------------------------|-------------------------------|-------------------------------|-------------------------------|-------------------------------|
| 0.5 m2 per pig (does not meet EU requirements) | (2) <input type="checkbox"/> | (3) <input type="checkbox"/> | (4) <input type="checkbox"/> | (12) <input type="checkbox"/> | (13) <input type="checkbox"/> | (14) <input type="checkbox"/> | (15) <input type="checkbox"/> | (16) <input type="checkbox"/> | (17) <input type="checkbox"/> | (18) <input type="checkbox"/> | (19) <input type="checkbox"/> | (20) <input type="checkbox"/> |
| 0.65 m2 per pig (meets EU requirements)        | (2) <input type="checkbox"/> | (3) <input type="checkbox"/> | (4) <input type="checkbox"/> | (12) <input type="checkbox"/> | (13) <input type="checkbox"/> | (14) <input type="checkbox"/> | (15) <input type="checkbox"/> | (16) <input type="checkbox"/> | (17) <input type="checkbox"/> | (18) <input type="checkbox"/> | (19) <input type="checkbox"/> | (20) <input type="checkbox"/> |
| 0.85 m2 per pig                                | (2) <input type="checkbox"/> | (3) <input type="checkbox"/> | (4) <input type="checkbox"/> | (12) <input type="checkbox"/> | (13) <input type="checkbox"/> | (14) <input type="checkbox"/> | (15) <input type="checkbox"/> | (16) <input type="checkbox"/> | (17) <input type="checkbox"/> | (18) <input type="checkbox"/> | (19) <input type="checkbox"/> | (20) <input type="checkbox"/> |
| 1 m2 per pig                                   | (2) <input type="checkbox"/> | (3) <input type="checkbox"/> | (4) <input type="checkbox"/> | (12) <input type="checkbox"/> | (13) <input type="checkbox"/> | (14) <input type="checkbox"/> | (15) <input type="checkbox"/> | (16) <input type="checkbox"/> | (17) <input type="checkbox"/> | (18) <input type="checkbox"/> | (19) <input type="checkbox"/> | (20) <input type="checkbox"/> |
| 1.3 m2 per pig                                 | (2) <input type="checkbox"/> | (3) <input type="checkbox"/> | (4) <input type="checkbox"/> | (12) <input type="checkbox"/> | (13) <input type="checkbox"/> | (14) <input type="checkbox"/> | (15) <input type="checkbox"/> | (16) <input type="checkbox"/> | (17) <input type="checkbox"/> | (18) <input type="checkbox"/> | (19) <input type="checkbox"/> | (20) <input type="checkbox"/> |
| 2 m2 per pig                                   | (2) <input type="checkbox"/> | (3) <input type="checkbox"/> | (4) <input type="checkbox"/> | (12) <input type="checkbox"/> | (13) <input type="checkbox"/> | (14) <input type="checkbox"/> | (15) <input type="checkbox"/> | (16) <input type="checkbox"/> | (17) <input type="checkbox"/> | (18) <input type="checkbox"/> | (19) <input type="checkbox"/> | (20) <input type="checkbox"/> |

|                                   | 0                            | 1                            | 2                            | 3                             | 4                             | 5                             | 6                             | 7                             | 8                             | 9                             | 10                            | Do not know                   |
|-----------------------------------|------------------------------|------------------------------|------------------------------|-------------------------------|-------------------------------|-------------------------------|-------------------------------|-------------------------------|-------------------------------|-------------------------------|-------------------------------|-------------------------------|
| 2 m2 per pig, with outdoor access | (2) <input type="checkbox"/> | (3) <input type="checkbox"/> | (4) <input type="checkbox"/> | (12) <input type="checkbox"/> | (13) <input type="checkbox"/> | (14) <input type="checkbox"/> | (15) <input type="checkbox"/> | (16) <input type="checkbox"/> | (17) <input type="checkbox"/> | (18) <input type="checkbox"/> | (19) <input type="checkbox"/> | (20) <input type="checkbox"/> |

What score would you give for pig welfare (100-110 kg) in a production system with the following restrictions for slatted floors? The scale is from 0 to 10 where 0 represents minimal welfare for the piglet and 10 represents the best possible welfare for the piglet.

|                                                     | 0                            | 1                            | 2                            | 3                             | 4                             | 5                             | 6                             | 7                             | 8                             | 9                             | 10                            | Do not know                   |
|-----------------------------------------------------|------------------------------|------------------------------|------------------------------|-------------------------------|-------------------------------|-------------------------------|-------------------------------|-------------------------------|-------------------------------|-------------------------------|-------------------------------|-------------------------------|
| Fully slatted floors (meets EU requirements)        | (2) <input type="checkbox"/> | (3) <input type="checkbox"/> | (4) <input type="checkbox"/> | (12) <input type="checkbox"/> | (13) <input type="checkbox"/> | (14) <input type="checkbox"/> | (15) <input type="checkbox"/> | (16) <input type="checkbox"/> | (17) <input type="checkbox"/> | (18) <input type="checkbox"/> | (19) <input type="checkbox"/> | (20) <input type="checkbox"/> |
| Slatted floors, max. two thirds of total floor area | (2) <input type="checkbox"/> | (3) <input type="checkbox"/> | (4) <input type="checkbox"/> | (12) <input type="checkbox"/> | (13) <input type="checkbox"/> | (14) <input type="checkbox"/> | (15) <input type="checkbox"/> | (16) <input type="checkbox"/> | (17) <input type="checkbox"/> | (18) <input type="checkbox"/> | (19) <input type="checkbox"/> | (20) <input type="checkbox"/> |
| Slatted floors, max. half of total floor area       | (2) <input type="checkbox"/> | (3) <input type="checkbox"/> | (4) <input type="checkbox"/> | (12) <input type="checkbox"/> | (13) <input type="checkbox"/> | (14) <input type="checkbox"/> | (15) <input type="checkbox"/> | (16) <input type="checkbox"/> | (17) <input type="checkbox"/> | (18) <input type="checkbox"/> | (19) <input type="checkbox"/> | (20) <input type="checkbox"/> |
| Slatted floors, max. one third of total floor area  | (2) <input type="checkbox"/> | (3) <input type="checkbox"/> | (4) <input type="checkbox"/> | (12) <input type="checkbox"/> | (13) <input type="checkbox"/> | (14) <input type="checkbox"/> | (15) <input type="checkbox"/> | (16) <input type="checkbox"/> | (17) <input type="checkbox"/> | (18) <input type="checkbox"/> | (19) <input type="checkbox"/> | (20) <input type="checkbox"/> |
| No slatted floors                                   | (2) <input type="checkbox"/> | (3) <input type="checkbox"/> | (4) <input type="checkbox"/> | (12) <input type="checkbox"/> | (13) <input type="checkbox"/> | (14) <input type="checkbox"/> | (15) <input type="checkbox"/> | (16) <input type="checkbox"/> | (17) <input type="checkbox"/> | (18) <input type="checkbox"/> | (19) <input type="checkbox"/> | (20) <input type="checkbox"/> |

## GENERAL ISSUES

What score would you give for pig welfare in a production system with the following practice for bedding? The scale is from 0 to 10 where 0 represents minimal welfare for the piglet and 10 represents the best possible welfare for the piglet regarding this feature.

|                                            | 0                            | 1                            | 2                            | 3                             | 4                             | 5                             | 6                             | 7                             | 8                             | 9                             | 10                            | Do not know                   |
|--------------------------------------------|------------------------------|------------------------------|------------------------------|-------------------------------|-------------------------------|-------------------------------|-------------------------------|-------------------------------|-------------------------------|-------------------------------|-------------------------------|-------------------------------|
| No bedding (does not meet EU requirements) | (2) <input type="checkbox"/> | (3) <input type="checkbox"/> | (4) <input type="checkbox"/> | (12) <input type="checkbox"/> | (13) <input type="checkbox"/> | (14) <input type="checkbox"/> | (15) <input type="checkbox"/> | (16) <input type="checkbox"/> | (17) <input type="checkbox"/> | (18) <input type="checkbox"/> | (19) <input type="checkbox"/> | (20) <input type="checkbox"/> |

|                                                                | 0                            | 1                            | 2                            | 3                             | 4                             | 5                             | 6                             | 7                             | 8                             | 9                             | 10                            | Do not know                   |
|----------------------------------------------------------------|------------------------------|------------------------------|------------------------------|-------------------------------|-------------------------------|-------------------------------|-------------------------------|-------------------------------|-------------------------------|-------------------------------|-------------------------------|-------------------------------|
| Bedding to be picked from a rack (meets EU requirements)       | (2) <input type="checkbox"/> | (3) <input type="checkbox"/> | (4) <input type="checkbox"/> | (12) <input type="checkbox"/> | (13) <input type="checkbox"/> | (14) <input type="checkbox"/> | (15) <input type="checkbox"/> | (16) <input type="checkbox"/> | (17) <input type="checkbox"/> | (18) <input type="checkbox"/> | (19) <input type="checkbox"/> | (20) <input type="checkbox"/> |
| Bedding on the floor                                           | (2) <input type="checkbox"/> | (3) <input type="checkbox"/> | (4) <input type="checkbox"/> | (12) <input type="checkbox"/> | (13) <input type="checkbox"/> | (14) <input type="checkbox"/> | (15) <input type="checkbox"/> | (16) <input type="checkbox"/> | (17) <input type="checkbox"/> | (18) <input type="checkbox"/> | (19) <input type="checkbox"/> | (20) <input type="checkbox"/> |
| Plenty of permanent bedding on the floor                       | (2) <input type="checkbox"/> | (3) <input type="checkbox"/> | (4) <input type="checkbox"/> | (12) <input type="checkbox"/> | (13) <input type="checkbox"/> | (14) <input type="checkbox"/> | (15) <input type="checkbox"/> | (16) <input type="checkbox"/> | (17) <input type="checkbox"/> | (18) <input type="checkbox"/> | (19) <input type="checkbox"/> | (20) <input type="checkbox"/> |
| Plenty of permanent bedding on the floor and in the lying area | (2) <input type="checkbox"/> | (3) <input type="checkbox"/> | (4) <input type="checkbox"/> | (12) <input type="checkbox"/> | (13) <input type="checkbox"/> | (14) <input type="checkbox"/> | (15) <input type="checkbox"/> | (16) <input type="checkbox"/> | (17) <input type="checkbox"/> | (18) <input type="checkbox"/> | (19) <input type="checkbox"/> | (20) <input type="checkbox"/> |

**What score would you give for pig welfare in a production system with the following practice for investigation and manipulation material? The scale is from 0 to 10 where 0 represents minimal welfare for the piglet and 10 represents the best possible welfare for the piglet.**

|                                                                             | 0                            | 1                            | 2                            | 3                             | 4                             | 5                             | 6                             | 7                             | 8                             | 9                             | 10                            | Do not know                   |
|-----------------------------------------------------------------------------|------------------------------|------------------------------|------------------------------|-------------------------------|-------------------------------|-------------------------------|-------------------------------|-------------------------------|-------------------------------|-------------------------------|-------------------------------|-------------------------------|
| No material on the floor (does not meet EU requirements)                    | (2) <input type="checkbox"/> | (3) <input type="checkbox"/> | (4) <input type="checkbox"/> | (12) <input type="checkbox"/> | (13) <input type="checkbox"/> | (14) <input type="checkbox"/> | (15) <input type="checkbox"/> | (16) <input type="checkbox"/> | (17) <input type="checkbox"/> | (18) <input type="checkbox"/> | (19) <input type="checkbox"/> | (20) <input type="checkbox"/> |
| Manipulation material includes a chain or car tyres (meets EU requirements) | (2) <input type="checkbox"/> | (3) <input type="checkbox"/> | (4) <input type="checkbox"/> | (12) <input type="checkbox"/> | (13) <input type="checkbox"/> | (14) <input type="checkbox"/> | (15) <input type="checkbox"/> | (16) <input type="checkbox"/> | (17) <input type="checkbox"/> | (18) <input type="checkbox"/> | (19) <input type="checkbox"/> | (20) <input type="checkbox"/> |
| Manipulation material includes a piece of wood                              | (2) <input type="checkbox"/> | (3) <input type="checkbox"/> | (4) <input type="checkbox"/> | (12) <input type="checkbox"/> | (13) <input type="checkbox"/> | (14) <input type="checkbox"/> | (15) <input type="checkbox"/> | (16) <input type="checkbox"/> | (17) <input type="checkbox"/> | (18) <input type="checkbox"/> | (19) <input type="checkbox"/> | (20) <input type="checkbox"/> |
| Manipulation material includes a piece of wood or saw dust                  | (2) <input type="checkbox"/> | (3) <input type="checkbox"/> | (4) <input type="checkbox"/> | (12) <input type="checkbox"/> | (13) <input type="checkbox"/> | (14) <input type="checkbox"/> | (15) <input type="checkbox"/> | (16) <input type="checkbox"/> | (17) <input type="checkbox"/> | (18) <input type="checkbox"/> | (19) <input type="checkbox"/> | (20) <input type="checkbox"/> |
| Manipulation material includes straw or sphagnum                            | (2) <input type="checkbox"/> | (3) <input type="checkbox"/> | (4) <input type="checkbox"/> | (12) <input type="checkbox"/> | (13) <input type="checkbox"/> | (14) <input type="checkbox"/> | (15) <input type="checkbox"/> | (16) <input type="checkbox"/> | (17) <input type="checkbox"/> | (18) <input type="checkbox"/> | (19) <input type="checkbox"/> | (20) <input type="checkbox"/> |

**What score would you give for pig welfare in a production system with the following practice for keeping animals in pen groups? The scale is from 0 to 10 where 0 represents minimal welfare for the piglet and 10 represents the best possible welfare for the piglet.**

|                                                                                      | 0                            | 1                            | 2                            | 3                             | 4                             | 5                             | 6                             | 7                             | 8                             | 9                             | 10                            | Do not know                   |
|--------------------------------------------------------------------------------------|------------------------------|------------------------------|------------------------------|-------------------------------|-------------------------------|-------------------------------|-------------------------------|-------------------------------|-------------------------------|-------------------------------|-------------------------------|-------------------------------|
| Pigs are mixed in new groups several times during their life (meets EU requirements) | (2) <input type="checkbox"/> | (3) <input type="checkbox"/> | (4) <input type="checkbox"/> | (12) <input type="checkbox"/> | (13) <input type="checkbox"/> | (14) <input type="checkbox"/> | (15) <input type="checkbox"/> | (16) <input type="checkbox"/> | (17) <input type="checkbox"/> | (18) <input type="checkbox"/> | (19) <input type="checkbox"/> | (20) <input type="checkbox"/> |
| Pigs are kept in pen groups for the entire production                                | (2) <input type="checkbox"/> | (3) <input type="checkbox"/> | (4) <input type="checkbox"/> | (12) <input type="checkbox"/> | (13) <input type="checkbox"/> | (14) <input type="checkbox"/> | (15) <input type="checkbox"/> | (16) <input type="checkbox"/> | (17) <input type="checkbox"/> | (18) <input type="checkbox"/> | (19) <input type="checkbox"/> | (20) <input type="checkbox"/> |

**What score would you give for pig welfare in a production system with the following practice for transport to slaughter? The scale is from 0 to 10 where 0 represents minimal welfare for the piglet and 10 represents the best possible welfare for the piglet.**

|                                                                                                                                                                                                  | 0                            | 1                            | 2                            | 3                             | 4                             | 5                             | 6                             | 7                             | 8                             | 9                             | 10                            | Do not know                   |
|--------------------------------------------------------------------------------------------------------------------------------------------------------------------------------------------------|------------------------------|------------------------------|------------------------------|-------------------------------|-------------------------------|-------------------------------|-------------------------------|-------------------------------|-------------------------------|-------------------------------|-------------------------------|-------------------------------|
| The pigs are transported for 24 hours without a break. After 24 hours, the pigs have a break of 24 hours with food and water, and are transported for a further 24 hours (meets EU requirements) | (2) <input type="checkbox"/> | (3) <input type="checkbox"/> | (4) <input type="checkbox"/> | (12) <input type="checkbox"/> | (13) <input type="checkbox"/> | (14) <input type="checkbox"/> | (15) <input type="checkbox"/> | (16) <input type="checkbox"/> | (17) <input type="checkbox"/> | (18) <input type="checkbox"/> | (19) <input type="checkbox"/> | (20) <input type="checkbox"/> |
| The pigs are transported for 24 hours without a break                                                                                                                                            | (2) <input type="checkbox"/> | (3) <input type="checkbox"/> | (4) <input type="checkbox"/> | (12) <input type="checkbox"/> | (13) <input type="checkbox"/> | (14) <input type="checkbox"/> | (15) <input type="checkbox"/> | (16) <input type="checkbox"/> | (17) <input type="checkbox"/> | (18) <input type="checkbox"/> | (19) <input type="checkbox"/> | (20) <input type="checkbox"/> |
| The pigs are transported for 8 hours plus time in the waiting area                                                                                                                               | (2) <input type="checkbox"/> | (3) <input type="checkbox"/> | (4) <input type="checkbox"/> | (12) <input type="checkbox"/> | (13) <input type="checkbox"/> | (14) <input type="checkbox"/> | (15) <input type="checkbox"/> | (16) <input type="checkbox"/> | (17) <input type="checkbox"/> | (18) <input type="checkbox"/> | (19) <input type="checkbox"/> | (20) <input type="checkbox"/> |

|                                                                         | 0                            | 1                            | 2                            | 3                             | 4                             | 5                             | 6                             | 7                             | 8                             | 9                             | 10                            | Do not know                   |
|-------------------------------------------------------------------------|------------------------------|------------------------------|------------------------------|-------------------------------|-------------------------------|-------------------------------|-------------------------------|-------------------------------|-------------------------------|-------------------------------|-------------------------------|-------------------------------|
| The pigs are transported for 8 hours including time in the waiting area | (2) <input type="checkbox"/> | (3) <input type="checkbox"/> | (4) <input type="checkbox"/> | (12) <input type="checkbox"/> | (13) <input type="checkbox"/> | (14) <input type="checkbox"/> | (15) <input type="checkbox"/> | (16) <input type="checkbox"/> | (17) <input type="checkbox"/> | (18) <input type="checkbox"/> | (19) <input type="checkbox"/> | (20) <input type="checkbox"/> |
| The pigs are transported for 4 hours plus time in the waiting area      | (2) <input type="checkbox"/> | (3) <input type="checkbox"/> | (4) <input type="checkbox"/> | (12) <input type="checkbox"/> | (13) <input type="checkbox"/> | (14) <input type="checkbox"/> | (15) <input type="checkbox"/> | (16) <input type="checkbox"/> | (17) <input type="checkbox"/> | (18) <input type="checkbox"/> | (19) <input type="checkbox"/> | (20) <input type="checkbox"/> |
| The pigs are transported for 4 hours including time in the waiting area | (2) <input type="checkbox"/> | (3) <input type="checkbox"/> | (4) <input type="checkbox"/> | (12) <input type="checkbox"/> | (13) <input type="checkbox"/> | (14) <input type="checkbox"/> | (15) <input type="checkbox"/> | (16) <input type="checkbox"/> | (17) <input type="checkbox"/> | (18) <input type="checkbox"/> | (19) <input type="checkbox"/> | (20) <input type="checkbox"/> |
| The pigs are not transported (mobile slaughtering units are used)       | (2) <input type="checkbox"/> | (3) <input type="checkbox"/> | (4) <input type="checkbox"/> | (12) <input type="checkbox"/> | (13) <input type="checkbox"/> | (14) <input type="checkbox"/> | (15) <input type="checkbox"/> | (16) <input type="checkbox"/> | (17) <input type="checkbox"/> | (18) <input type="checkbox"/> | (19) <input type="checkbox"/> | (20) <input type="checkbox"/> |

## EVALUATION OF THE IMPORTANCE OF INDIVIDUAL ANIMAL WELFARE ASPECTS

Finally, we ask you to evaluate the importance of each of the above-mentioned aspects of the production system against other changes in the production that might affect animal welfare.

The scale is from 1 (not important) to 5 (very important). If, for example, you evaluate two different aspects as “very important”, they will have the same weight when welfare levels in individual production systems are measured together.

|                                                                                                               | 1                            | 2                            | 3                             | 4                             | 5                             | Do not know                   |
|---------------------------------------------------------------------------------------------------------------|------------------------------|------------------------------|-------------------------------|-------------------------------|-------------------------------|-------------------------------|
| 1. How important is loose-housing for sow welfare?                                                            | (3) <input type="checkbox"/> | (4) <input type="checkbox"/> | (12) <input type="checkbox"/> | (13) <input type="checkbox"/> | (14) <input type="checkbox"/> | (15) <input type="checkbox"/> |
| 2. How important is space in the farrowing unit for sow welfare?                                              | (3) <input type="checkbox"/> | (4) <input type="checkbox"/> | (12) <input type="checkbox"/> | (13) <input type="checkbox"/> | (14) <input type="checkbox"/> | (15) <input type="checkbox"/> |
| 3. How important is space for sow welfare when she is loose in group housing (in mating and gestation units)? | (3) <input type="checkbox"/> | (4) <input type="checkbox"/> | (12) <input type="checkbox"/> | (13) <input type="checkbox"/> | (14) <input type="checkbox"/> | (15) <input type="checkbox"/> |

|                                                    | 1                            | 2                            | 3                             | 4                             | 5                             | Do not know                   |
|----------------------------------------------------|------------------------------|------------------------------|-------------------------------|-------------------------------|-------------------------------|-------------------------------|
| 4. How important is nest-building for sow welfare? | (3) <input type="checkbox"/> | (4) <input type="checkbox"/> | (12) <input type="checkbox"/> | (13) <input type="checkbox"/> | (14) <input type="checkbox"/> | (15) <input type="checkbox"/> |

|                                                      |                              |                              |                               |                               |                               |                               |
|------------------------------------------------------|------------------------------|------------------------------|-------------------------------|-------------------------------|-------------------------------|-------------------------------|
| 5. How important is the weaning age for sow welfare? | (3) <input type="checkbox"/> | (4) <input type="checkbox"/> | (12) <input type="checkbox"/> | (13) <input type="checkbox"/> | (14) <input type="checkbox"/> | (15) <input type="checkbox"/> |
|------------------------------------------------------|------------------------------|------------------------------|-------------------------------|-------------------------------|-------------------------------|-------------------------------|

|                                                                     | 1                            | 2                            | 3                             | 4                             | 5                             | Do not know                   |
|---------------------------------------------------------------------|------------------------------|------------------------------|-------------------------------|-------------------------------|-------------------------------|-------------------------------|
| 6. How important is space in the farrowing unit for piglet welfare? | (3) <input type="checkbox"/> | (4) <input type="checkbox"/> | (12) <input type="checkbox"/> | (13) <input type="checkbox"/> | (14) <input type="checkbox"/> | (15) <input type="checkbox"/> |

|                                                                                        |                              |                              |                               |                               |                               |                               |
|----------------------------------------------------------------------------------------|------------------------------|------------------------------|-------------------------------|-------------------------------|-------------------------------|-------------------------------|
| 7. How important is it for piglet welfare that the sow is loose in the farrowing unit? | (3) <input type="checkbox"/> | (4) <input type="checkbox"/> | (12) <input type="checkbox"/> | (13) <input type="checkbox"/> | (14) <input type="checkbox"/> | (15) <input type="checkbox"/> |
|----------------------------------------------------------------------------------------|------------------------------|------------------------------|-------------------------------|-------------------------------|-------------------------------|-------------------------------|

|                                                     |                              |                              |                               |                               |                               |                               |
|-----------------------------------------------------|------------------------------|------------------------------|-------------------------------|-------------------------------|-------------------------------|-------------------------------|
| 8. How important is weaning age for piglet welfare? | (3) <input type="checkbox"/> | (4) <input type="checkbox"/> | (12) <input type="checkbox"/> | (13) <input type="checkbox"/> | (14) <input type="checkbox"/> | (15) <input type="checkbox"/> |
|-----------------------------------------------------|------------------------------|------------------------------|-------------------------------|-------------------------------|-------------------------------|-------------------------------|

|                                                                                                                                         |                              |                              |                               |                               |                               |                               |
|-----------------------------------------------------------------------------------------------------------------------------------------|------------------------------|------------------------------|-------------------------------|-------------------------------|-------------------------------|-------------------------------|
| 9. How important are initiatives regarding tail docking for piglet welfare when there is a risk of tail biting if tails are not docked? | (3) <input type="checkbox"/> | (4) <input type="checkbox"/> | (12) <input type="checkbox"/> | (13) <input type="checkbox"/> | (14) <input type="checkbox"/> | (15) <input type="checkbox"/> |
|-----------------------------------------------------------------------------------------------------------------------------------------|------------------------------|------------------------------|-------------------------------|-------------------------------|-------------------------------|-------------------------------|

|                                                                                                                                           |                              |                              |                               |                               |                               |                               |
|-------------------------------------------------------------------------------------------------------------------------------------------|------------------------------|------------------------------|-------------------------------|-------------------------------|-------------------------------|-------------------------------|
| 10. How important are initiatives regarding tail docking for piglet welfare when there is no risk of tail biting if tails are not docked? | (3) <input type="checkbox"/> | (4) <input type="checkbox"/> | (12) <input type="checkbox"/> | (13) <input type="checkbox"/> | (14) <input type="checkbox"/> | (15) <input type="checkbox"/> |
|-------------------------------------------------------------------------------------------------------------------------------------------|------------------------------|------------------------------|-------------------------------|-------------------------------|-------------------------------|-------------------------------|

|                                                                                                                                                |                              |                              |                               |                               |                               |                               |
|------------------------------------------------------------------------------------------------------------------------------------------------|------------------------------|------------------------------|-------------------------------|-------------------------------|-------------------------------|-------------------------------|
| 11. How important are initiatives regarding castration for piglet welfare? Note: Include piglet welfare relating to both the castration itself | (3) <input type="checkbox"/> | (4) <input type="checkbox"/> | (12) <input type="checkbox"/> | (13) <input type="checkbox"/> | (14) <input type="checkbox"/> | (15) <input type="checkbox"/> |
|------------------------------------------------------------------------------------------------------------------------------------------------|------------------------------|------------------------------|-------------------------------|-------------------------------|-------------------------------|-------------------------------|



|                                                                       | 1 | 2 | 3 | 4 | 5 | Do not know |
|-----------------------------------------------------------------------|---|---|---|---|---|-------------|
| and to differences in behaviour in castrated and non-castrated boars. |   |   |   |   |   |             |

|                                                                                   | 1                            | 2                            | 3                             | 4                             | 5                             | Do not know                   |
|-----------------------------------------------------------------------------------|------------------------------|------------------------------|-------------------------------|-------------------------------|-------------------------------|-------------------------------|
| 12. How important is space for weaner welfare?                                    | (3) <input type="checkbox"/> | (4) <input type="checkbox"/> | (12) <input type="checkbox"/> | (13) <input type="checkbox"/> | (14) <input type="checkbox"/> | (15) <input type="checkbox"/> |
| 13. How important is space for finisher welfare?                                  | (3) <input type="checkbox"/> | (4) <input type="checkbox"/> | (12) <input type="checkbox"/> | (13) <input type="checkbox"/> | (14) <input type="checkbox"/> | (15) <input type="checkbox"/> |
| 14. How important are initiatives to limit slatted flooring for weaner welfare?   | (3) <input type="checkbox"/> | (4) <input type="checkbox"/> | (12) <input type="checkbox"/> | (13) <input type="checkbox"/> | (14) <input type="checkbox"/> | (15) <input type="checkbox"/> |
| 15. How important are initiatives to limit slatted flooring for finisher welfare? | (3) <input type="checkbox"/> | (4) <input type="checkbox"/> | (12) <input type="checkbox"/> | (13) <input type="checkbox"/> | (14) <input type="checkbox"/> | (15) <input type="checkbox"/> |

|                                                                                         | 1                            | 2                            | 3                             | 4                             | 5                             | Do not know                   |
|-----------------------------------------------------------------------------------------|------------------------------|------------------------------|-------------------------------|-------------------------------|-------------------------------|-------------------------------|
| 16. How important is bedding for pig welfare?                                           | (3) <input type="checkbox"/> | (4) <input type="checkbox"/> | (12) <input type="checkbox"/> | (13) <input type="checkbox"/> | (14) <input type="checkbox"/> | (15) <input type="checkbox"/> |
| 17. How important is access to investigation and manipulation material for pig welfare? | (3) <input type="checkbox"/> | (4) <input type="checkbox"/> | (12) <input type="checkbox"/> | (13) <input type="checkbox"/> | (14) <input type="checkbox"/> | (15) <input type="checkbox"/> |
| 18. How important are pen groups for pig welfare?                                       | (3) <input type="checkbox"/> | (4) <input type="checkbox"/> | (12) <input type="checkbox"/> | (13) <input type="checkbox"/> | (14) <input type="checkbox"/> | (15) <input type="checkbox"/> |
| 19. How important is transportation time for pig welfare?                               | (3) <input type="checkbox"/> | (4) <input type="checkbox"/> | (12) <input type="checkbox"/> | (13) <input type="checkbox"/> | (14) <input type="checkbox"/> | (15) <input type="checkbox"/> |

**Thank you for participating in this survey. If you have any comments please list them here.**

---

---

---

---

---

---

---

**In order to be able to send you an Amazon voucher of 50 Euro, we ask you to write you email below. We will delete this information afterwards.**

---

---

---

---

---

---

---

**We thank you for participating in our survey!**
