# Supplementary material for: Benchmarking Farm Animal Welfare—A Novel Tool for Cross-Country Comparison Applied to Pig Production and Pork Consumption
Source: MDPI journal article supplement (doi:10.3390/ani10060955), 2020-05-31
Supplement: s1 [file s1]

## S6: Calculation of coefficients

The stock of pigs can be divided into piglets, fattening pigs, sows, etc. in different age groups. Animal welfare characteristics relate to different parts of the production or herd. Some countries have a relatively large piglet production, so in these countries the animal welfare characteristics found in piglet production should be given greater weight. The relative size of the different groups of pigs is calculated, and weights are estimated. Data input and calculations are presented below.

**Table: Composition of pig population**

| <b>Population, 1.000 animals</b>               |         |         |             |        |                |         |
|------------------------------------------------|---------|---------|-------------|--------|----------------|---------|
|                                                | Denmark | Germany | Netherlands | Sweden | United Kingdom | Total   |
| Live swine, domestic species                   | 12.642  | 26.445  | 11.934      | 1.417  | 4.648          | 57.087  |
| Piglets, less than 20 kg                       | 4.543   | 7.672   | 5.307       | 355    | 1.216          | 19.093  |
| Breeding pigs                                  | 1.254   | 1.855   | 978         | 125    | 502            | 4.714   |
| Breeding sows                                  | 1.243   | 1.837   | 970         | 123    | 490            | 4.663   |
| Covered sows                                   | 775     | 1.314   | 642         | 81     | 340            | 3.153   |
| Sows covered for the first time                | 190     | 209     | 108         | 58     | 55             | 620     |
| Sows, not covered                              | 468     | 523     | 328         | 42     | 150            | 1.510   |
| Gilts not yet covered                          | 223     | 226     | 134         | 23     | 84             | 690     |
| Pigs, from 20 kg to less than 50 kg            | 3.937   | 5.049   | 1.617       | 369    | 1.187          | 12.159  |
| Fattening pigs, 50 kg or over                  | 2.908   | 11.870  | 4.033       | 568    | 1.743          | 21.123  |
| Fattening pigs, from 50 kg to less than 80 kg  | 2.321   | 5.360   | 1.666       | 239    | 1.023          | 10.609  |
| Fattening pigs, from 80 kg to less than 110 kg | 580     | 5.284   | 1.679       | 231    | 664            | 8.438   |
| Fattening pigs, 110 kg or over                 | 7       | 1.227   | 687         | 98     | 56             | 2.075   |
| Breeding boars                                 | 11      | 18      | 8           | 1      | 12             | 50      |
|                                                |         |         |             |        |                |         |
| <b>Population, 1.000 animals</b>               |         |         |             |        |                |         |
|                                                | Denmark | Germany | Netherlands | Sweden | United Kingdom |         |
| Sows                                           | 4.153   | 5.964   | 3.160       | 452    | 1.621          | 15.349  |
| Piglets                                        | 8.480   | 12.720  | 6.924       | 724    | 2.403          | 31.252  |
| Fattening pigs                                 | 5.816   | 23.741  | 8.065       | 1.137  | 3.486          | 42.244  |
|                                                |         |         |             |        |                |         |
| <b>Population, percent</b>                     |         |         |             |        |                |         |
|                                                | Denmark | Germany | Netherlands | Sweden | United Kingdom | Average |
| Sows                                           | 22,5    | 14,1    | 17,4        | 19,5   | 21,6           | 17,3    |
| Piglets                                        | 46,0    | 30,0    | 38,2        | 31,3   | 32,0           | 35,2    |
| Fattening pigs                                 | 31,5    | 56,0    | 44,4        | 49,1   | 46,4           | 47,5    |
|                                                |         |         |             |        |                |         |
| <b>Population, coefficient</b>                 |         |         |             |        |                |         |
|                                                | Denmark | Germany | Netherlands | Sweden | United Kingdom | Average |
| Sows                                           | 1,3     | 0,8     | 1,0         | 1,1    | 1,2            | 1,0     |
| Piglets                                        | 1,3     | 0,9     | 1,1         | 0,9    | 0,9            | 1,0     |
| Fattening pigs                                 | 0,7     | 1,2     | 0,9         | 1,0    | 1,0            | 1,0     |
| All                                            | 1,0     | 1,0     | 1,0         | 1,0    | 1,0            | 1,0     |

Source: Eurostat (2020)
