# Supplementary material for: Benchmarking Farm Animal Welfare—A Novel Tool for Cross-Country Comparison Applied to Pig Production and Pork Consumption
Source: MDPI journal article supplement (doi:10.3390/ani10060955), 2020-05-31
Supplement: s1 [file s1]

**Table S7: Import composition of domestic consumption assessments**

As import of pigmeat is significant, both import volume, import countries and import as a share of domestic consumption is important. These figures (plus production, export etc.) are shown in this file.

## Assumptions regarding import shares, consumption etc.

### Sweden

|                                 |            |
|---------------------------------|------------|
| <b>Supply balance</b>           | 1.000 tons |
| Production                      | 241        |
| Import Quantity                 | 117        |
| Export Quantity                 | 29         |
| Domestic supply quantity        | 330        |
| Import - percent of production  | 35         |
| Import - percent of consumption | 49         |

#### Import from major countries (USD, 2017)

|             |             |       |
|-------------|-------------|-------|
| Germany     | 112.846.386 | 38,0  |
| Denmark     | 82.571.807  | 27,8  |
| Poland      | 48.816.630  | 16,4  |
| Netherlands | 27.298.928  | 9,2   |
| UK          | 3.849.814   | 1,3   |
| Spain       | 3.331.035   | 1,1   |
| Other       | 18.548.383  | 6,2   |
| Total       | 297.262.983 | 100,0 |

### Germany

|                                 |            |
|---------------------------------|------------|
| <b>Supply balance</b>           | 1.000 tons |
| Production                      | 5506       |
| Import Quantity                 | 1191       |
| Export Quantity                 | 2563       |
| Domestic supply quantity        | 4170       |
| Import - percent of production  | 29         |
| Import - percent of consumption | 22         |

#### Import from major countries (USD, 2017)

|             |               |       |
|-------------|---------------|-------|
| Belgium     | 593.927.161   | 32,2  |
| Denmark     | 538.714.377   | 29,2  |
| Netherlands | 296.344.578   | 16,1  |
| Spain       | 137.012.476   | 7,4   |
| Poland      | 101.953.315   | 5,5   |
| UK          | 47.253.394    | 2,6   |
| France      | 38.895.465    | 2,1   |
| Other       | 91.873.894    | 5,0   |
| Total       | 1.845.974.660 | 100,0 |

### Netherlands

|                                 |            |
|---------------------------------|------------|
| <b>Supply balance</b>           | 1.000 tons |
| Production                      | 1456       |
| Import Quantity                 | 392        |
| Export Quantity                 | 1201       |
| Domestic supply quantity        | 636        |
| Import - percent of production  | 62         |
| Import - percent of consumption | 27         |

#### Import from major countries (USD, 2017)

|         |             |       |
|---------|-------------|-------|
| Germany | 465.943.748 | 66,2  |
| Belgium | 83.421.574  | 11,9  |
| France  | 38.174.192  | 5,4   |
| Poland  | 34.953.601  | 5,0   |
| Denmark | 20.006.976  | 2,8   |
| Other   | 60.882.035  | 8,7   |
| Total   | 703.382.126 | 100,0 |

### Denmark

|                                 |            |
|---------------------------------|------------|
| <b>Supply balance</b>           | 1.000 tons |
| Production                      | 1532       |
| Import Quantity                 | 137        |
| Export Quantity                 | 1397       |
| Domestic supply quantity        | 240        |
| Import - percent of production  | 57         |
| Import - percent of consumption | 9          |

#### Import from major countries (USD, 2017)

|             |             |       |
|-------------|-------------|-------|
| Germany     | 101.967.911 | 70,1  |
| Netherlands | 10.749.200  | 7,4   |
| Spain       | 9.472.531   | 6,5   |
| Norway      | 5.600.672   | 3,8   |
| Spain       | 5.242.626   | 3,6   |
| Other       | 12.528.624  | 8,6   |
| Total       | 145.561.564 | 100,0 |

### U.K.

|                                 |            |
|---------------------------------|------------|
| <b>Supply balance</b>           | 1.000 tons |
| Production                      | 901        |
| Import Quantity                 | 979        |
| Export Quantity                 | 262        |
| Domestic supply quantity        | 1649       |
| Import - percent of production  | 59         |
| Import - percent of consumption | 109        |

#### Import from major countries (USD, 2017)

|             |               |       |
|-------------|---------------|-------|
| Denmark     | 385.895.356   | 32,0  |
| Germany     | 254.218.324   | 21,1  |
| Netherlands | 130.893.527   | 10,8  |
| Spain       | 115.900.769   | 9,6   |
| Ireland     | 104.956.242   | 8,7   |
| Belgium     | 80.371.213    | 6,7   |
| France      | 59.824.572    | 5,0   |
| Other       | 75.192.023    | 6,2   |
| Total       | 1.207.252.026 | 100,0 |
